# Supplementary material
Source: publisher figshare collection journal article supplement (https://acs.figshare.com/ndownloader/files/20299953)
Supplement: Supplementary file 1 [file 20299953]

# Redox Isomeric Ferrocenyl Styrylruthenium Radical Cations with Diphenyl-Substituted $\beta$ -Ketoenolato Ligands

Christopher Hassenrück,<sup>[a]</sup> Mykhailo Azarkh,<sup>[a]</sup> Malte Drescher<sup>[a]</sup>, Michael Linseis,<sup>[a]</sup> Serhiy Demeshko,<sup>[b]</sup> Franc Meyer,<sup>[b]</sup> and Rainer F. Winter<sup>\*[a]</sup>

[a] University of Konstanz, Department of Chemistry, Universitätsstraße 10, 78457 Konstanz, Germany

[b] Georg-August-Universität Göttingen, Institut für Anorganische Chemie, Tammannstraße 4, 37077 Göttingen, Germany

## Supporting Information

### NMR spectra

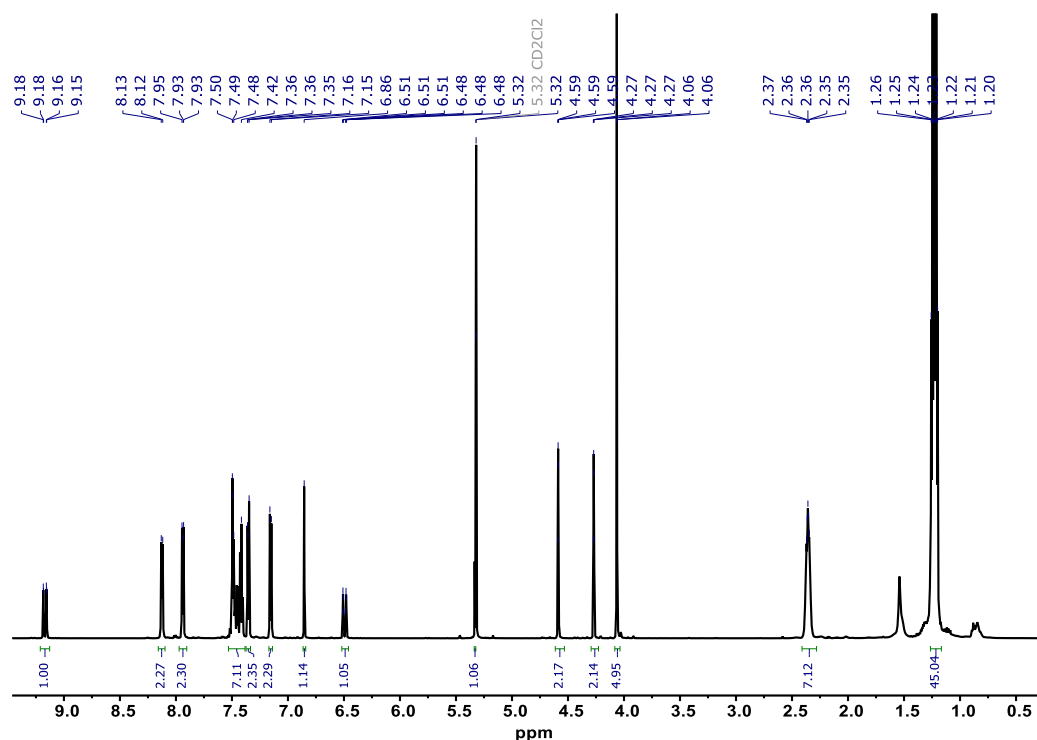

Figure S1.  $^1\text{H}$  NMR spectrum of **2-H** in  $\text{CD}_2\text{Cl}_2$  at room temperature.

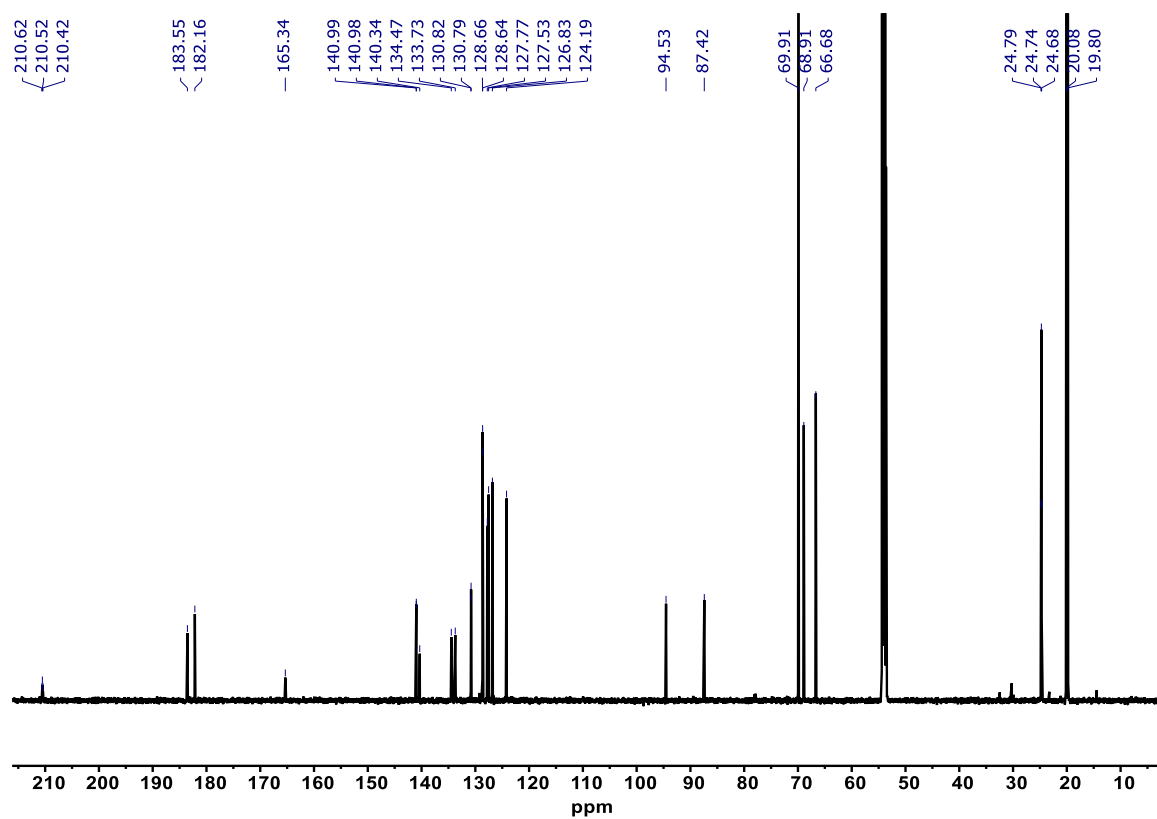

Figure S2.  $^{13}\text{C}$  NMR spectrum of **2-H** in  $\text{CD}_2\text{Cl}_2$  at room temperature.

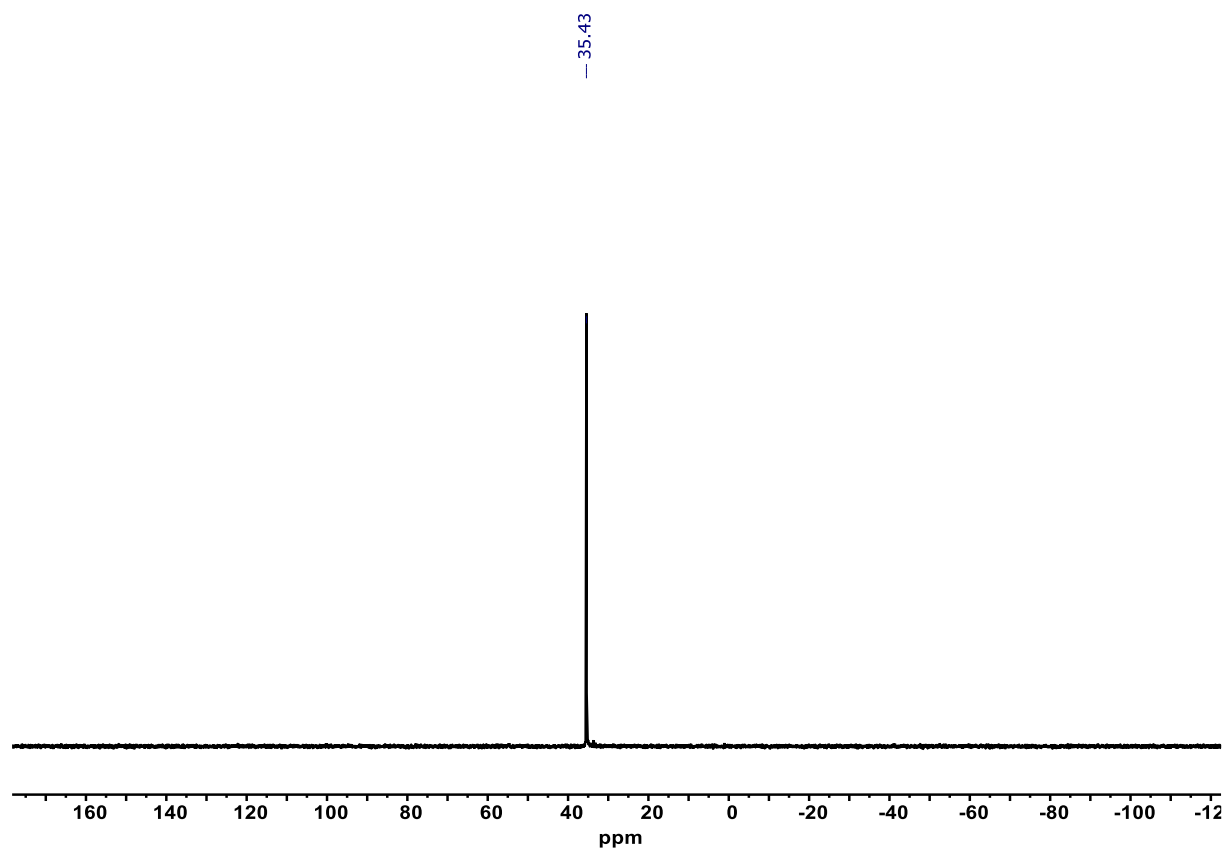

Figure S3.  $^{31}\text{P}$  NMR spectrum of **2-H** in  $\text{CD}_2\text{Cl}_2$  at room temperature.

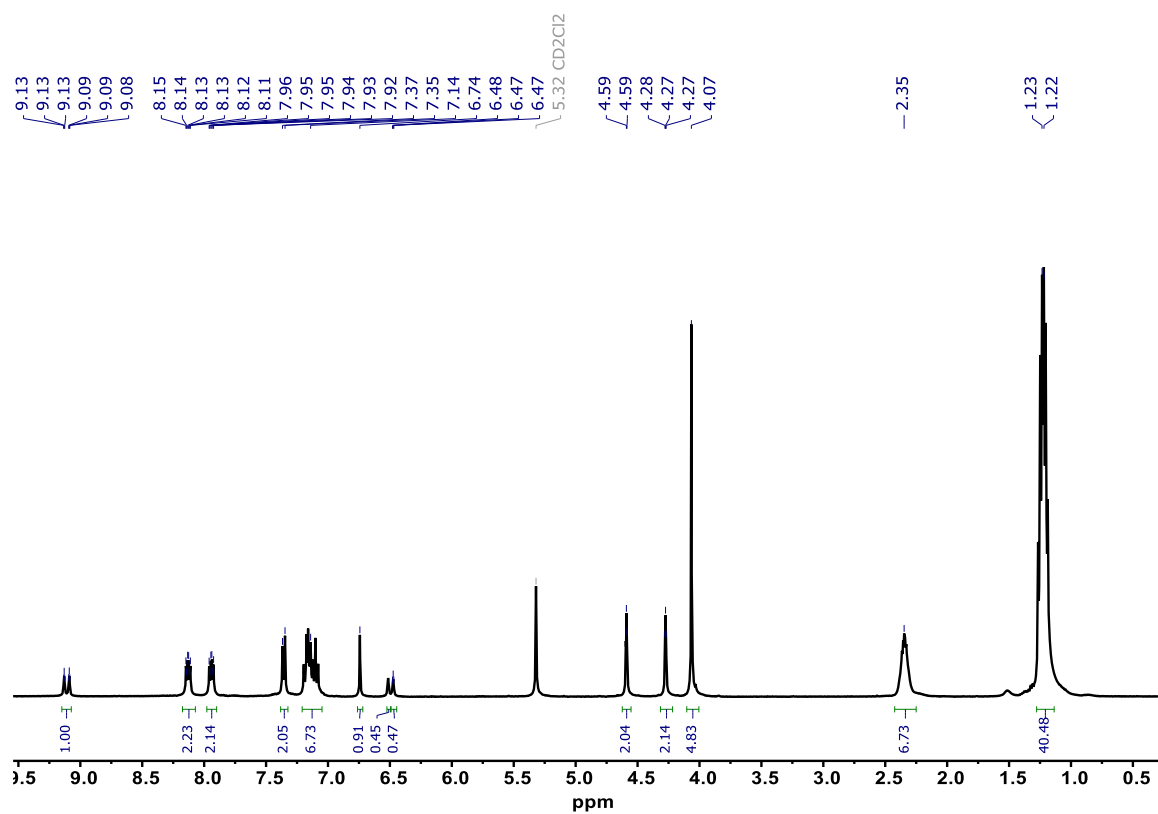

Figure S4. <sup>1</sup>H NMR spectrum of **2-F** in CD<sub>2</sub>Cl<sub>2</sub> at room temperature.

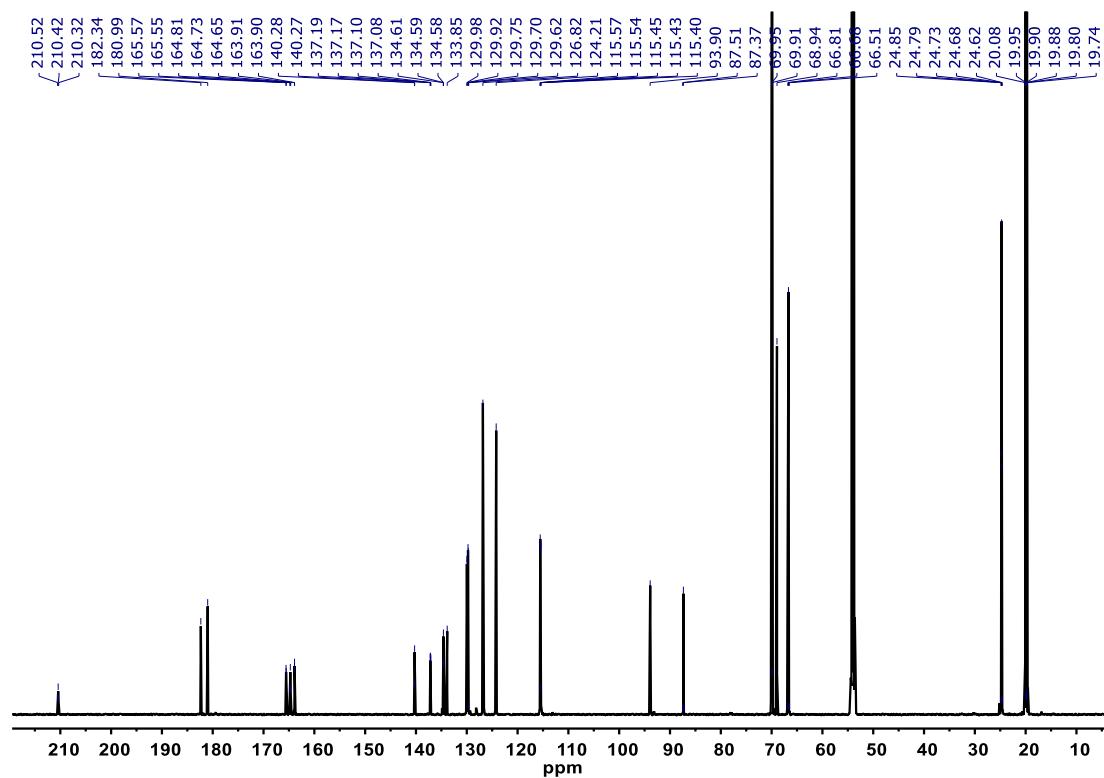

Figure S5. <sup>13</sup>C NMR spectrum of **2-F** in CD<sub>2</sub>Cl<sub>2</sub> at room temperature.

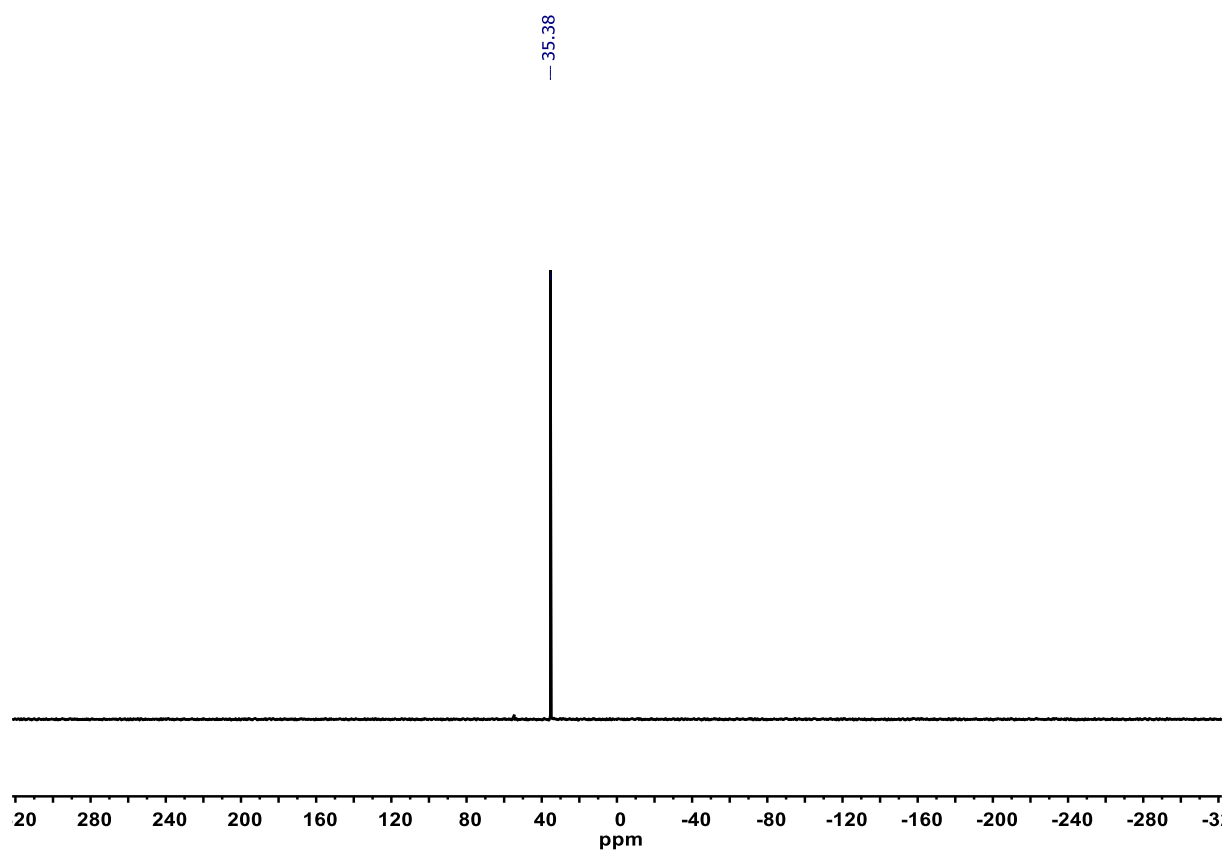

Figure S6.  $^{31}\text{P}$  NMR spectrum of **2-F** in  $\text{CD}_2\text{Cl}_2$  at room temperature.

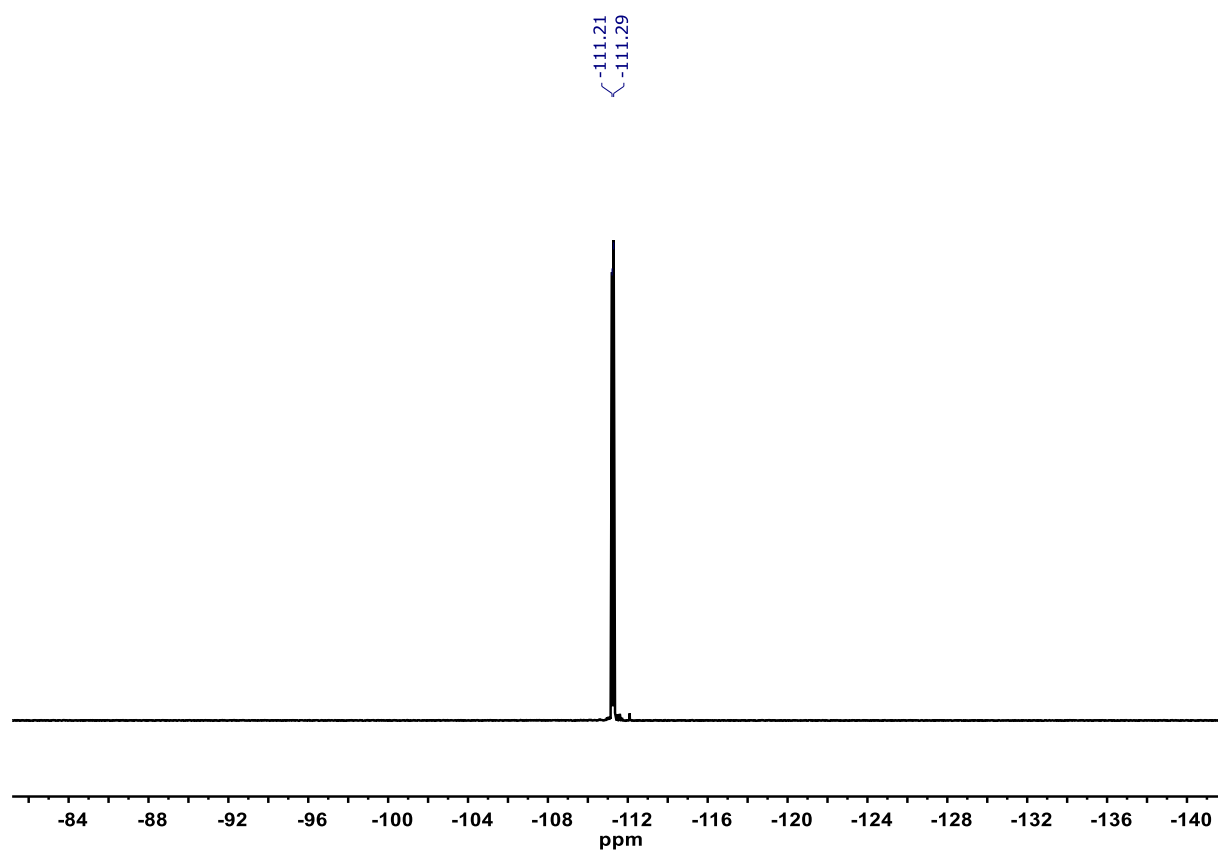

Figure S7.  $^{19}\text{F}$  NMR spectrum of **2-F** in  $\text{CD}_2\text{Cl}_2$  at room temperature.

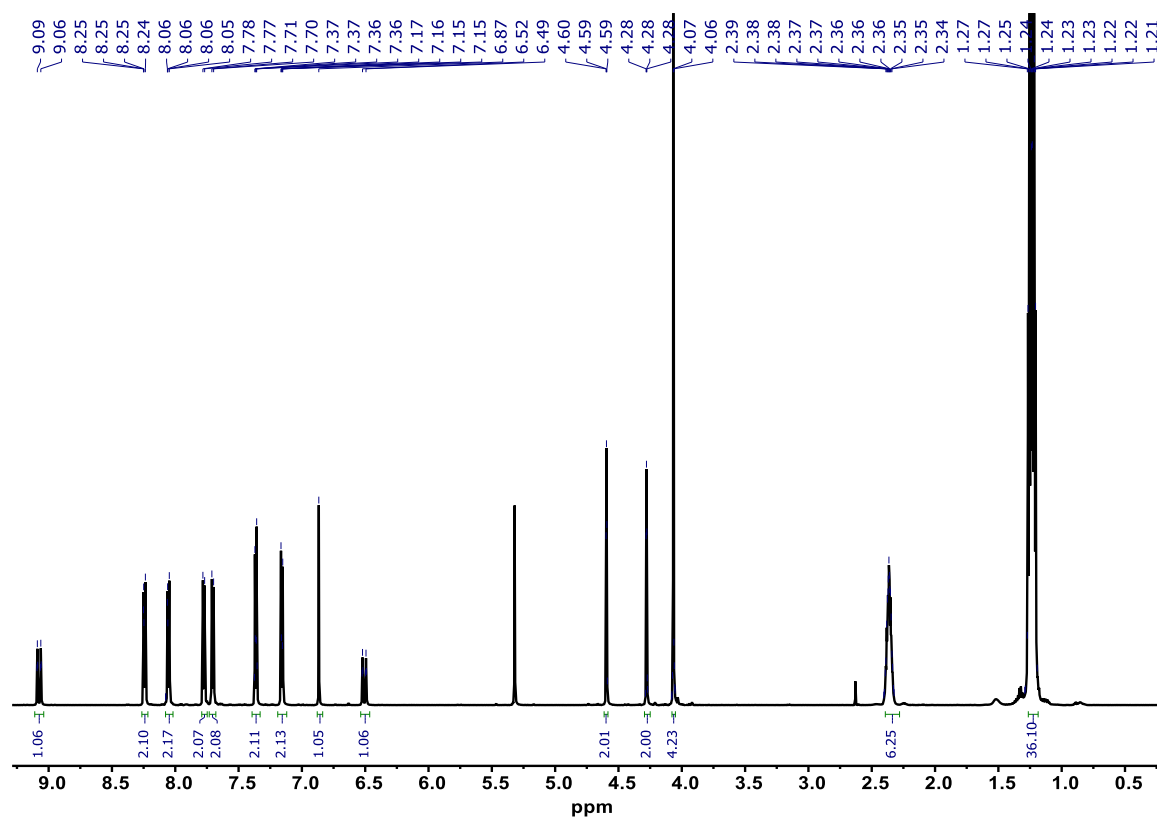

Figure S8. <sup>1</sup>H NMR spectrum of **2-CF<sub>3</sub>** in CD<sub>2</sub>Cl<sub>2</sub> at room temperature.

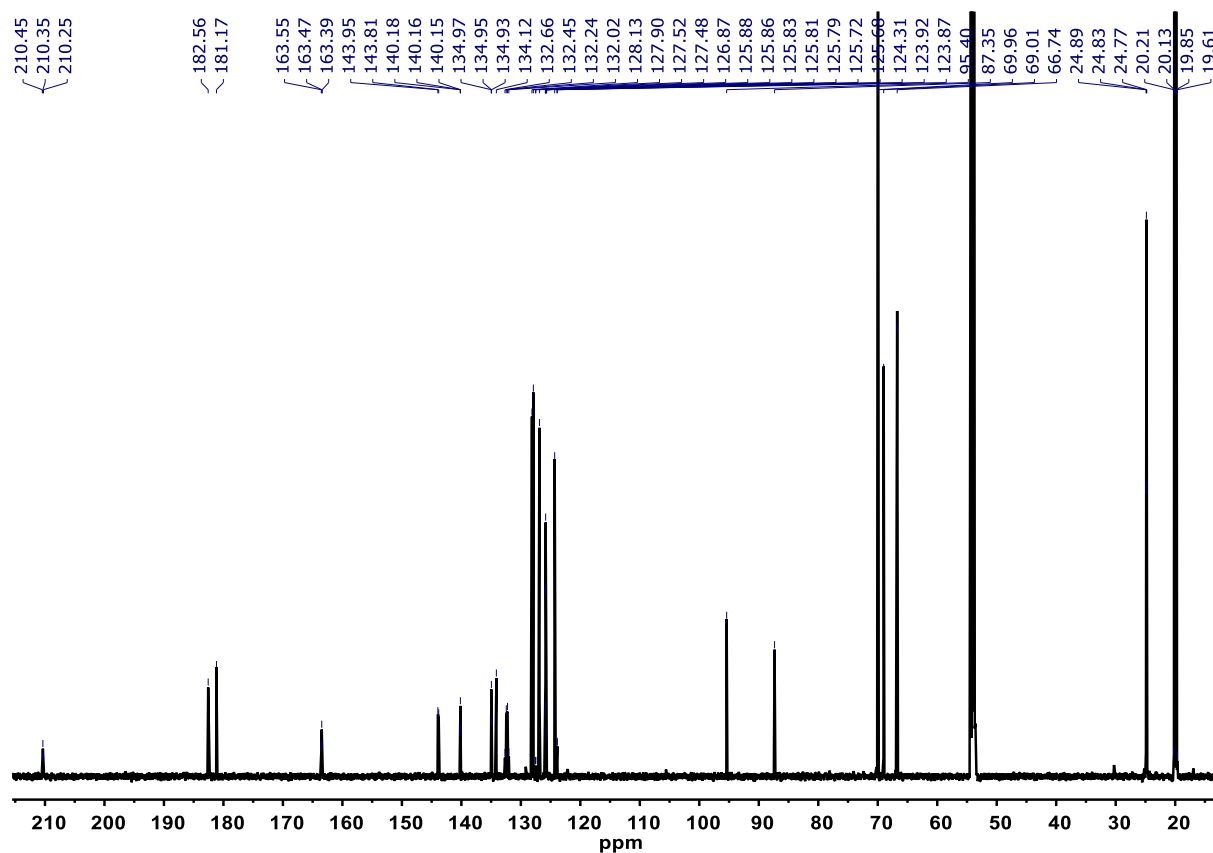

Figure S9. <sup>13</sup>C NMR spectrum of **2-CF<sub>3</sub>** in CD<sub>2</sub>Cl<sub>2</sub> at room temperature.

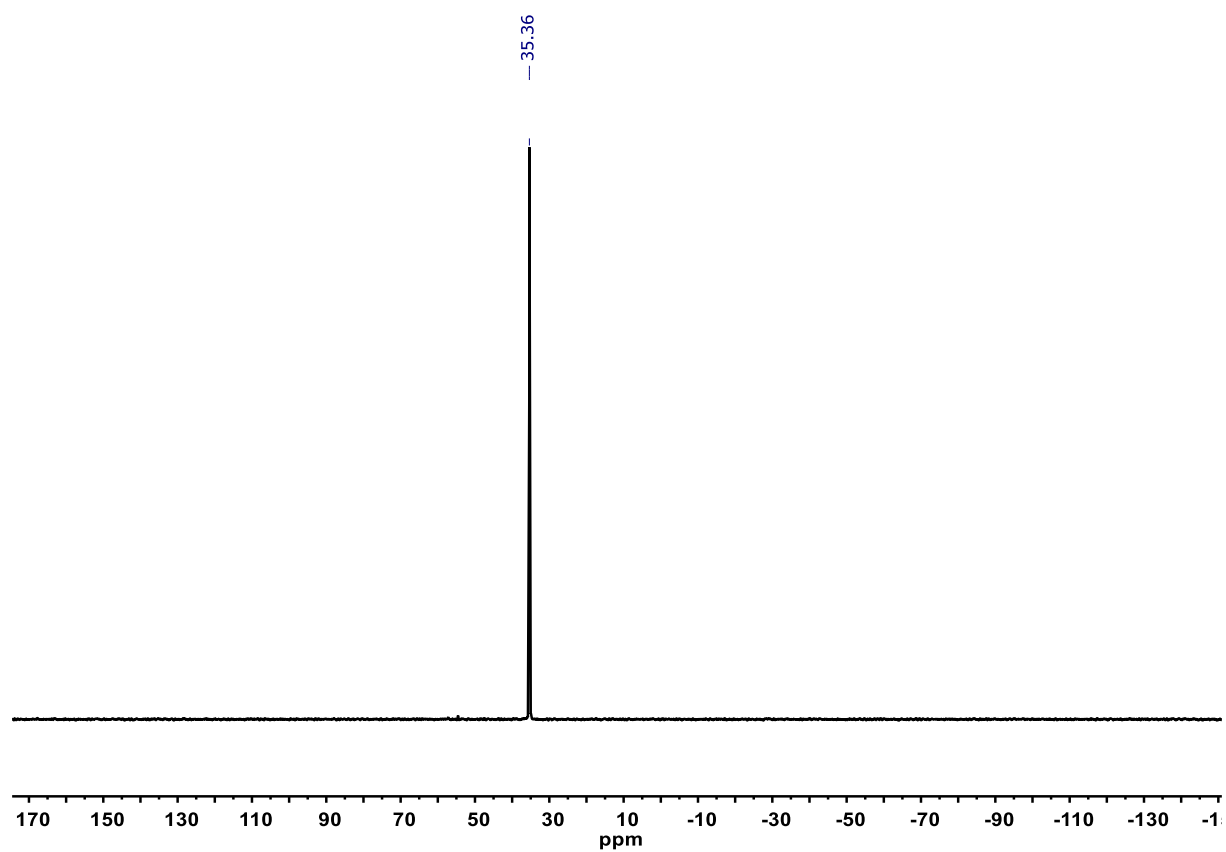

Figure S10.  $^{31}\text{P}$  NMR spectrum of **2-CF<sub>3</sub>** in  $\text{CD}_2\text{Cl}_2$  at room temperature.

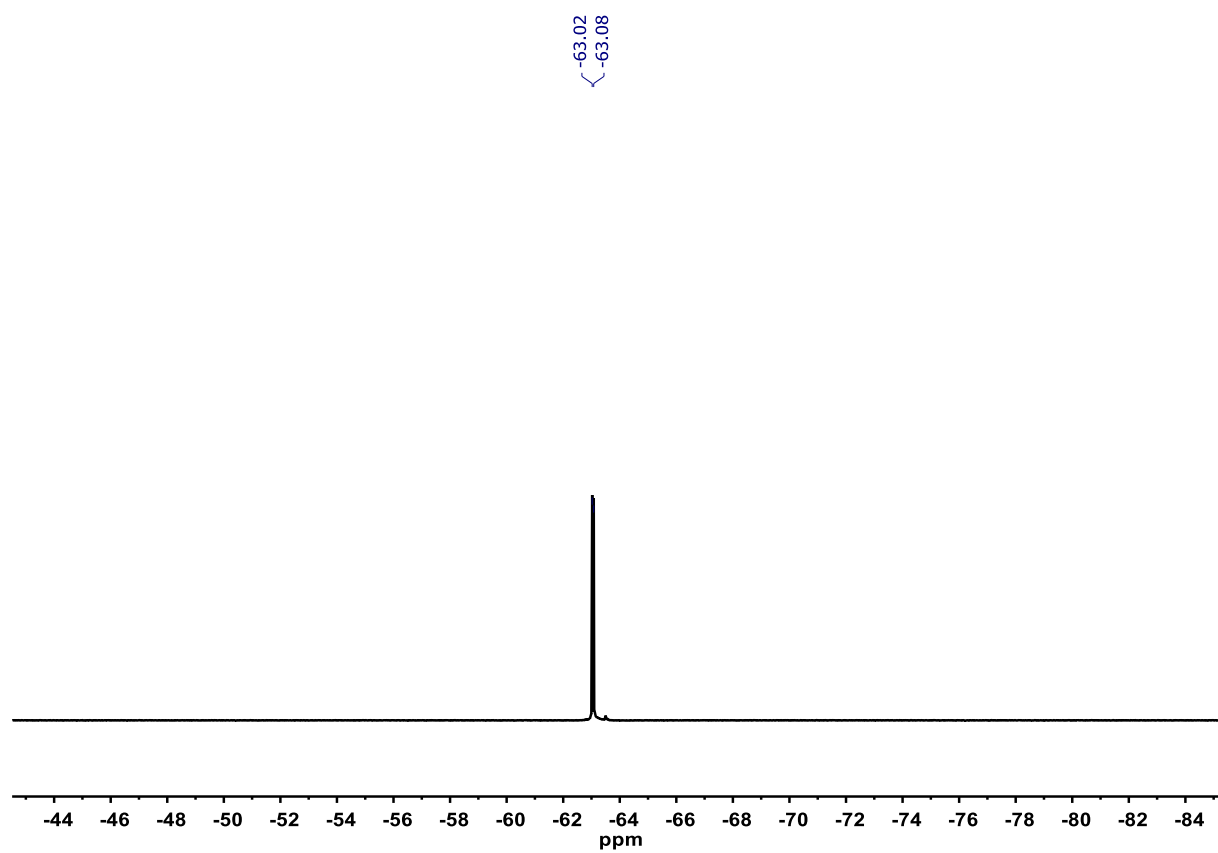

Figure S11.  $^{19}\text{F}$  NMR spectrum of **2-CF<sub>3</sub>** in  $\text{CD}_2\text{Cl}_2$  at room temperature.

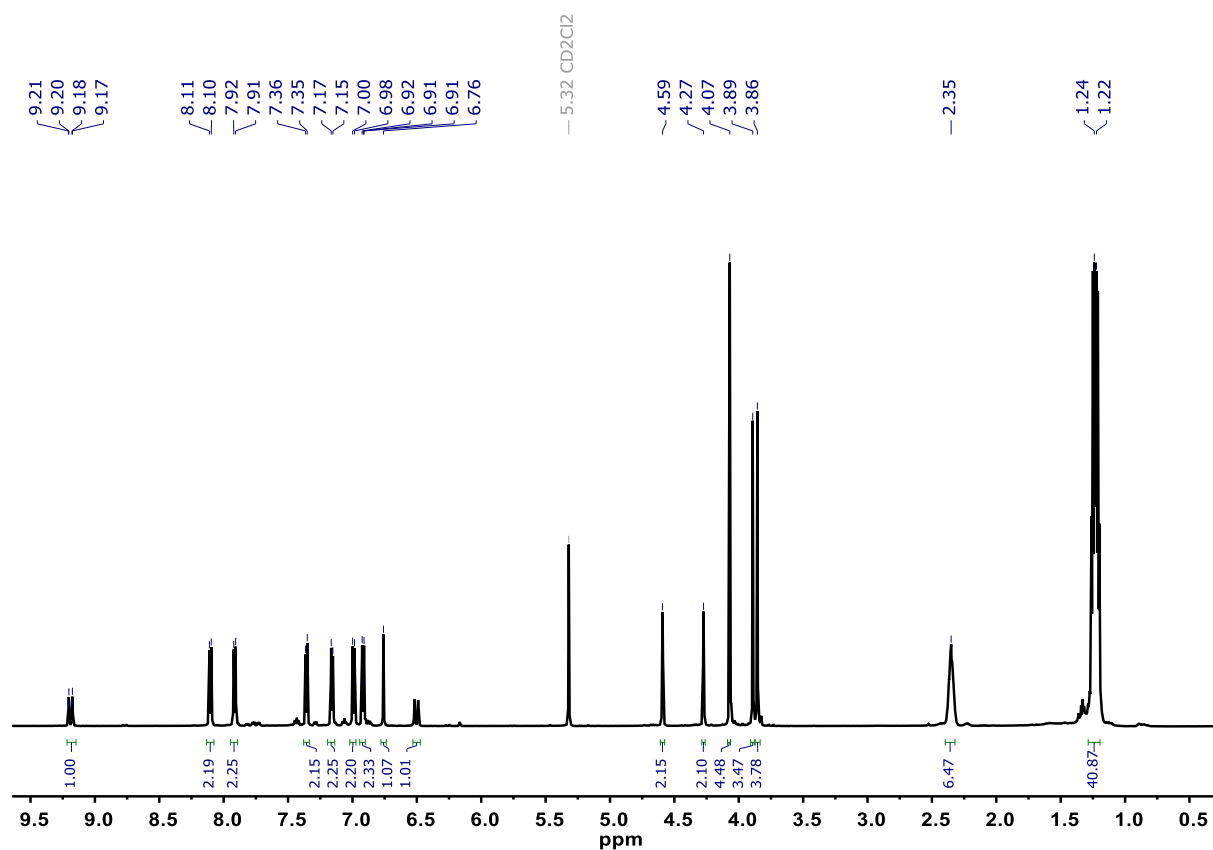

Figure S12. <sup>1</sup>H NMR spectrum of **2-OMe** in CD<sub>2</sub>Cl<sub>2</sub> at room temperature.

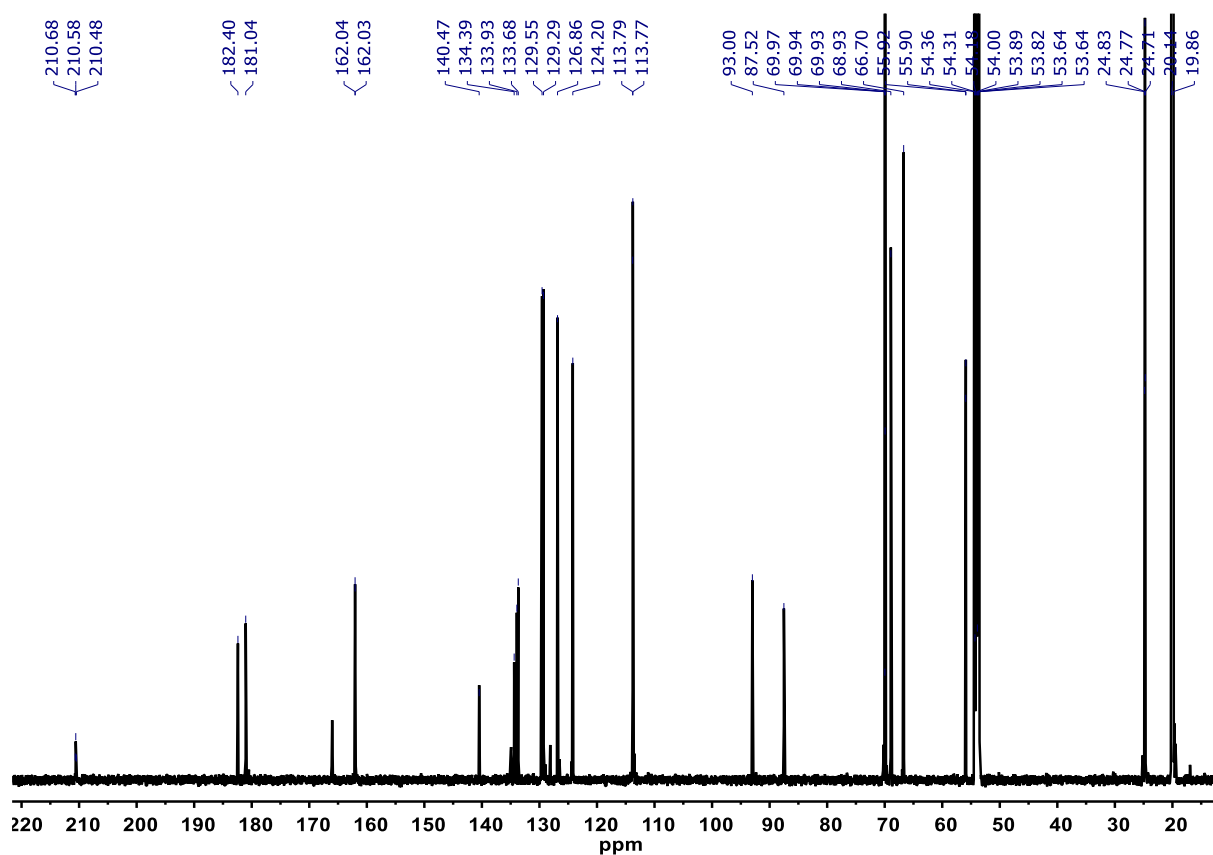

Figure S13. <sup>13</sup>C NMR spectrum of **2-OMe** in CD<sub>2</sub>Cl<sub>2</sub> at room temperature.

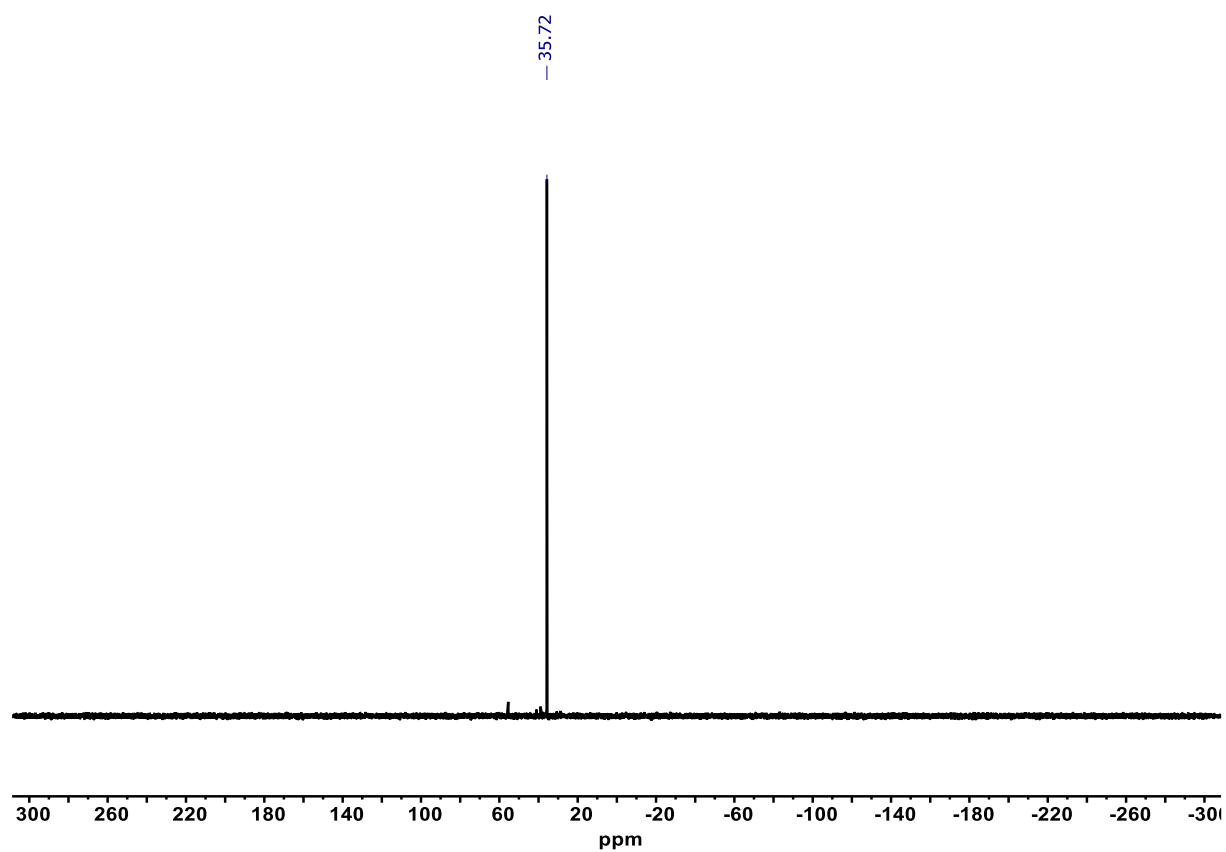

Figure S14.  $^{31}\text{P}$  NMR spectrum of **2-OMe** in  $\text{CD}_2\text{Cl}_2$  at room temperature.



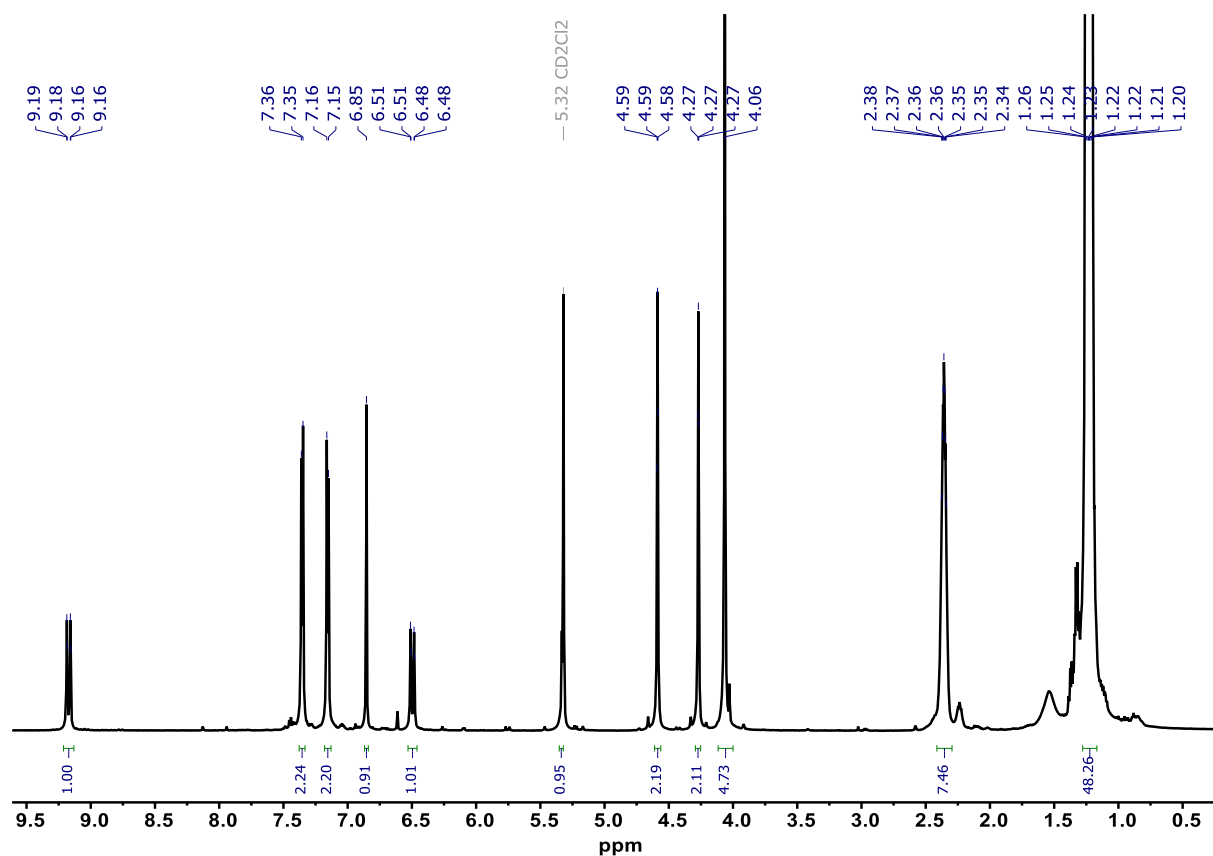

Figure S15. <sup>1</sup>H NMR spectrum of **2-D** in CD<sub>2</sub>Cl<sub>2</sub> at room temperature.

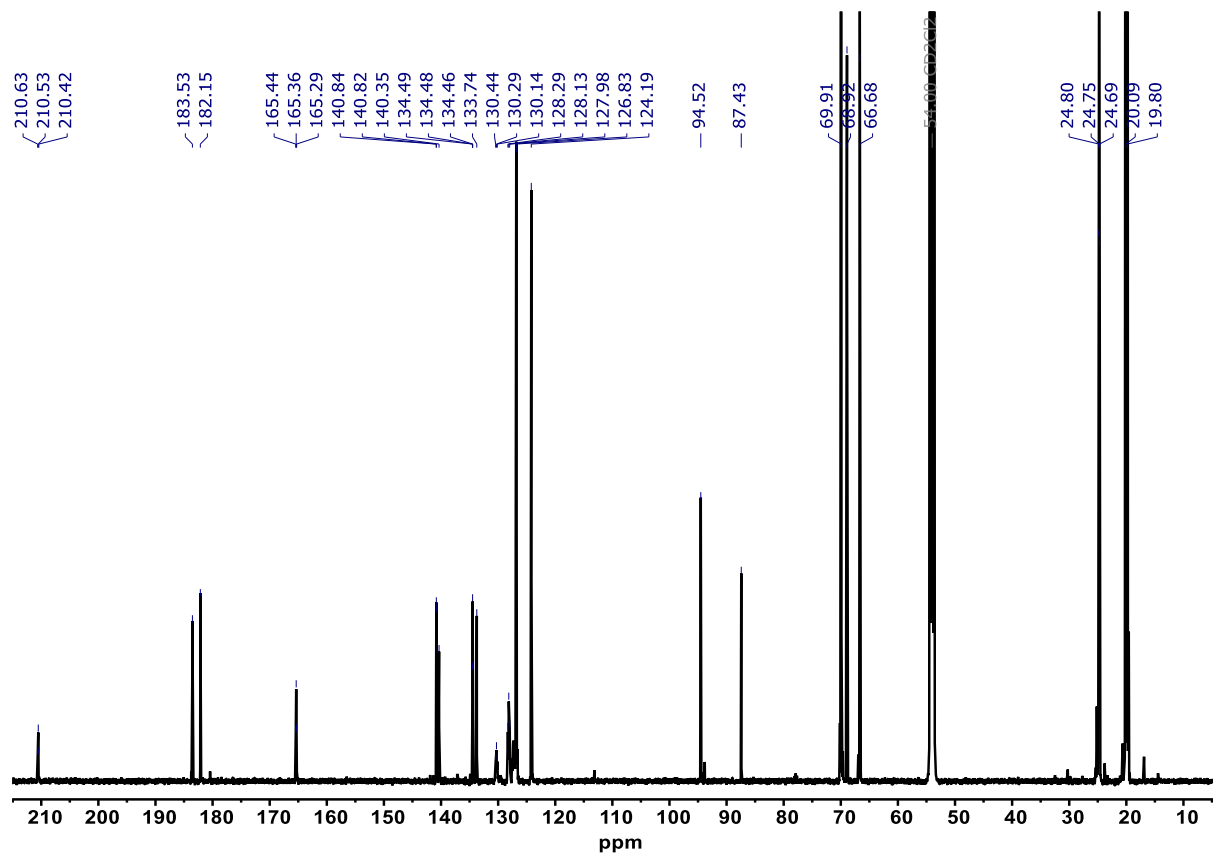

Figure S16. <sup>13</sup>C NMR spectrum of **2-D** in CD<sub>2</sub>Cl<sub>2</sub> at room temperature.

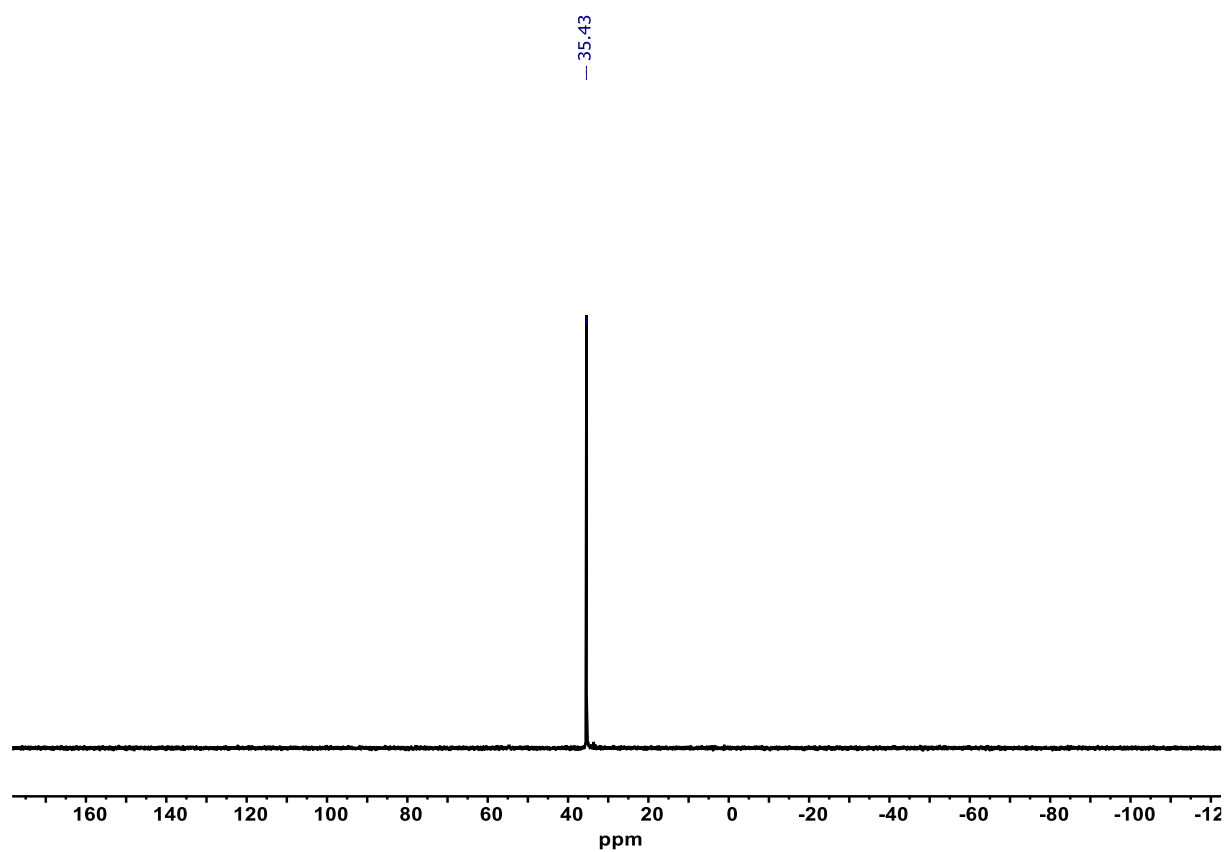

Figure S17.  $^{31}\text{P}$  NMR spectrum of **2-D** in  $\text{CD}_2\text{Cl}_2$  at room temperature.

### X-ray diffraction study

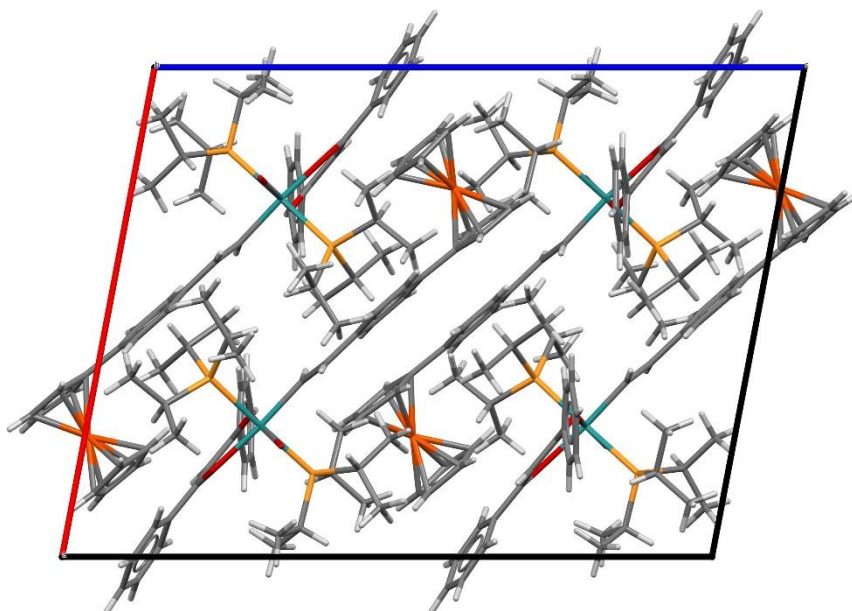

Figure S18. Packing of individual molecules in the crystal of complex **2-H**.

## Electrochemistry

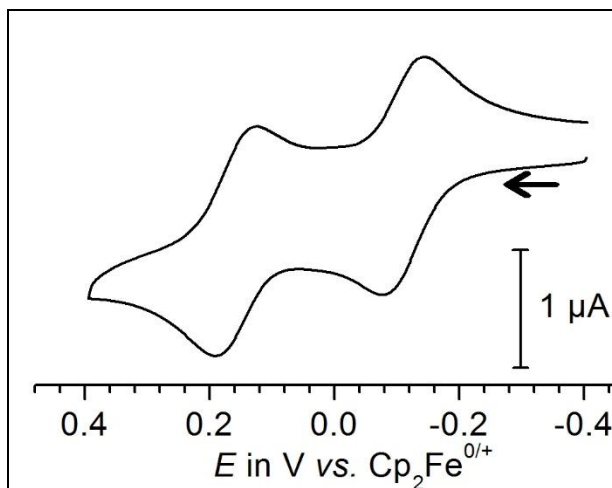

Figure S19. Cyclic voltammogram of **2-OMe** in  $\text{CH}_2\text{Cl}_2$  /  $\text{NBu}_4\text{PF}_6$  (0.1 M) at room temperature, scan rate  $\nu = 100$  mV/s.

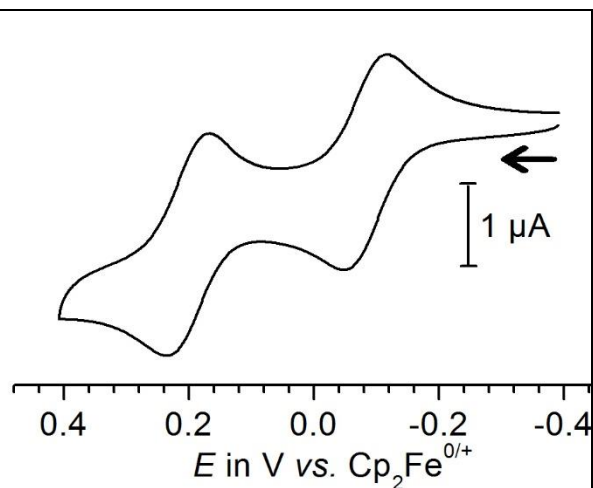

Figure S20. Cyclic voltammogram of **2-F** in  $\text{CH}_2\text{Cl}_2$  /  $\text{NBu}_4\text{PF}_6$  (0.1 M) at room temperature, scan rate  $\nu = 100$  mV/s.

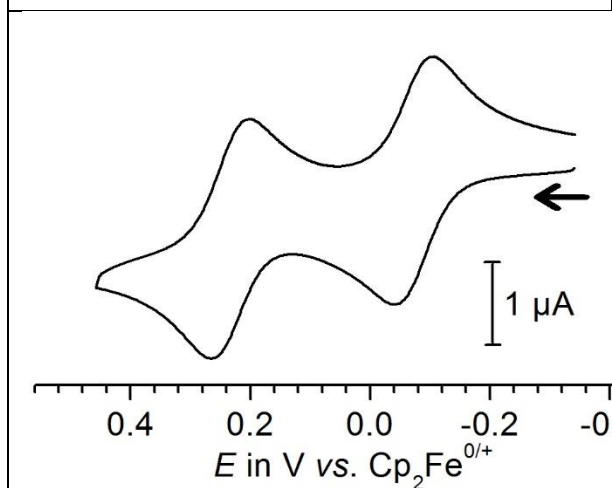

Figure S21. Cyclic voltammogram of **2-CF<sub>3</sub>** in  $\text{CH}_2\text{Cl}_2$  /  $\text{NBu}_4\text{PF}_6$  (0.1 M) at room temperature, scan rate  $\nu = 100$  mV/s.

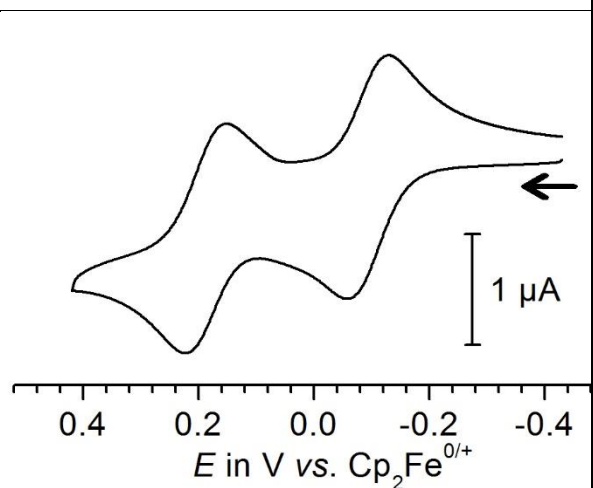

Figure S22. Cyclic voltammogram of **2-D** in  $\text{CH}_2\text{Cl}_2$  /  $\text{NBu}_4\text{PF}_6$  (0.1 M) at room temperature, scan rate  $\nu = 100$  mV/s.

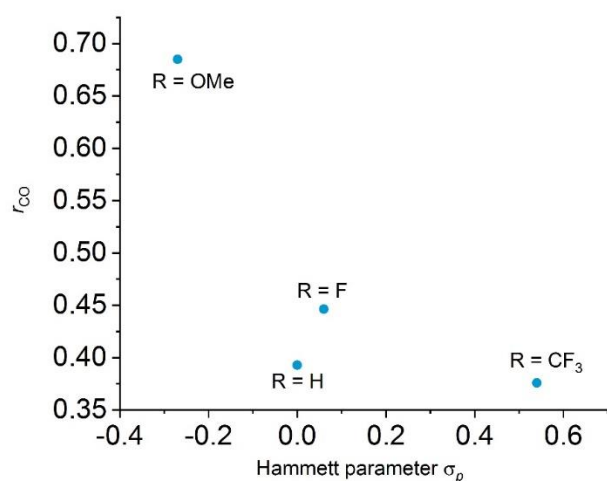

Figure S23. Plot of the  $\sigma$ -Hammett parameter of the substituents at the phenyl rings of the ketoenolato ligands *versus*  $r_{CO}$ .

## Quantum chemistry

Table S1. Percentage of the MO coefficient contributions of the three complex entities to the HOMO of the neutral complexes calculated by population analysis (6-31G(d)/pbe1pbe level of theory).

|                         | <b>Ru(CO)Cl(P<sup>i</sup>PR<sub>3</sub>)<sub>2</sub>(acac)</b> | <b>styryl</b> | <b>Fc</b> |
|-------------------------|----------------------------------------------------------------|---------------|-----------|
| <b>2-OMe</b>            | 37                                                             | 54            | 9         |
| <b>2-H</b>              | 36                                                             | 54            | 10        |
| <b>2-CF<sub>3</sub></b> | 32                                                             | 55            | 13        |

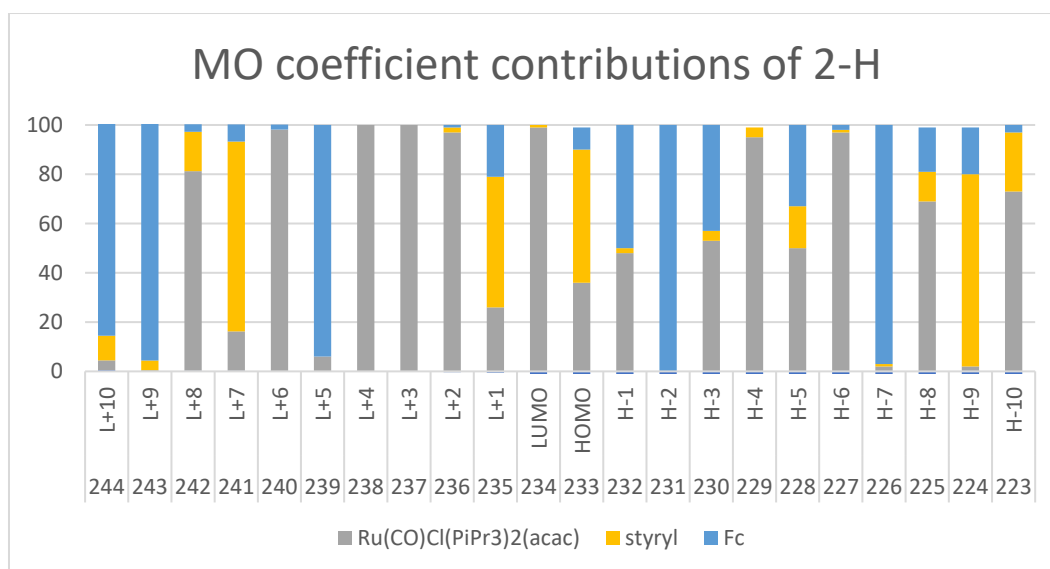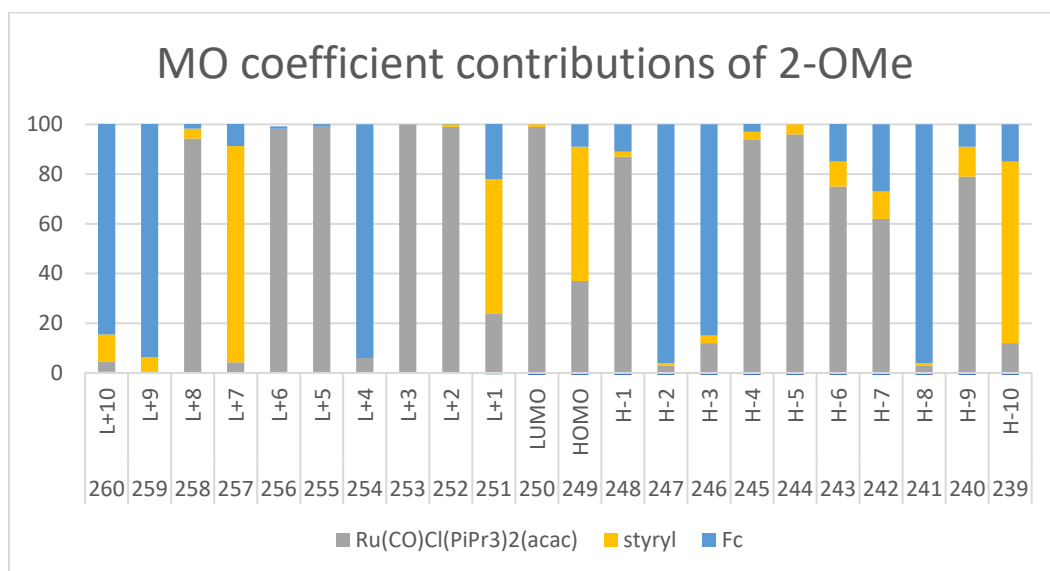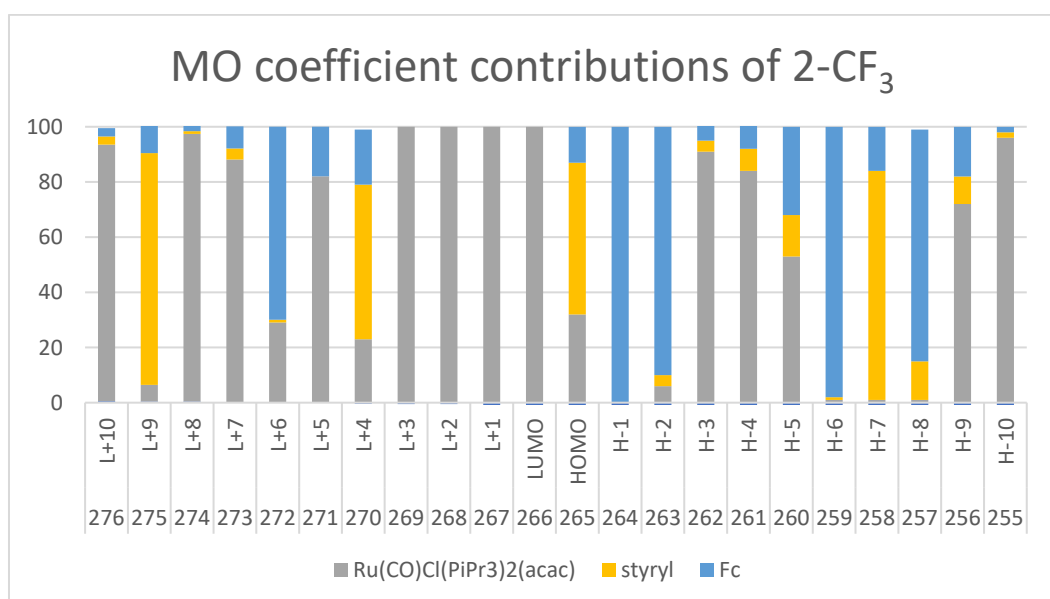

Figure S24. Compositions of MOs HOMO-10 to LUMO+10 for complexes **2-H**, **2-OMe** and **2-CF<sub>3</sub>**.

### Temperature- and solvent-dependence of the IR and NIR spectra

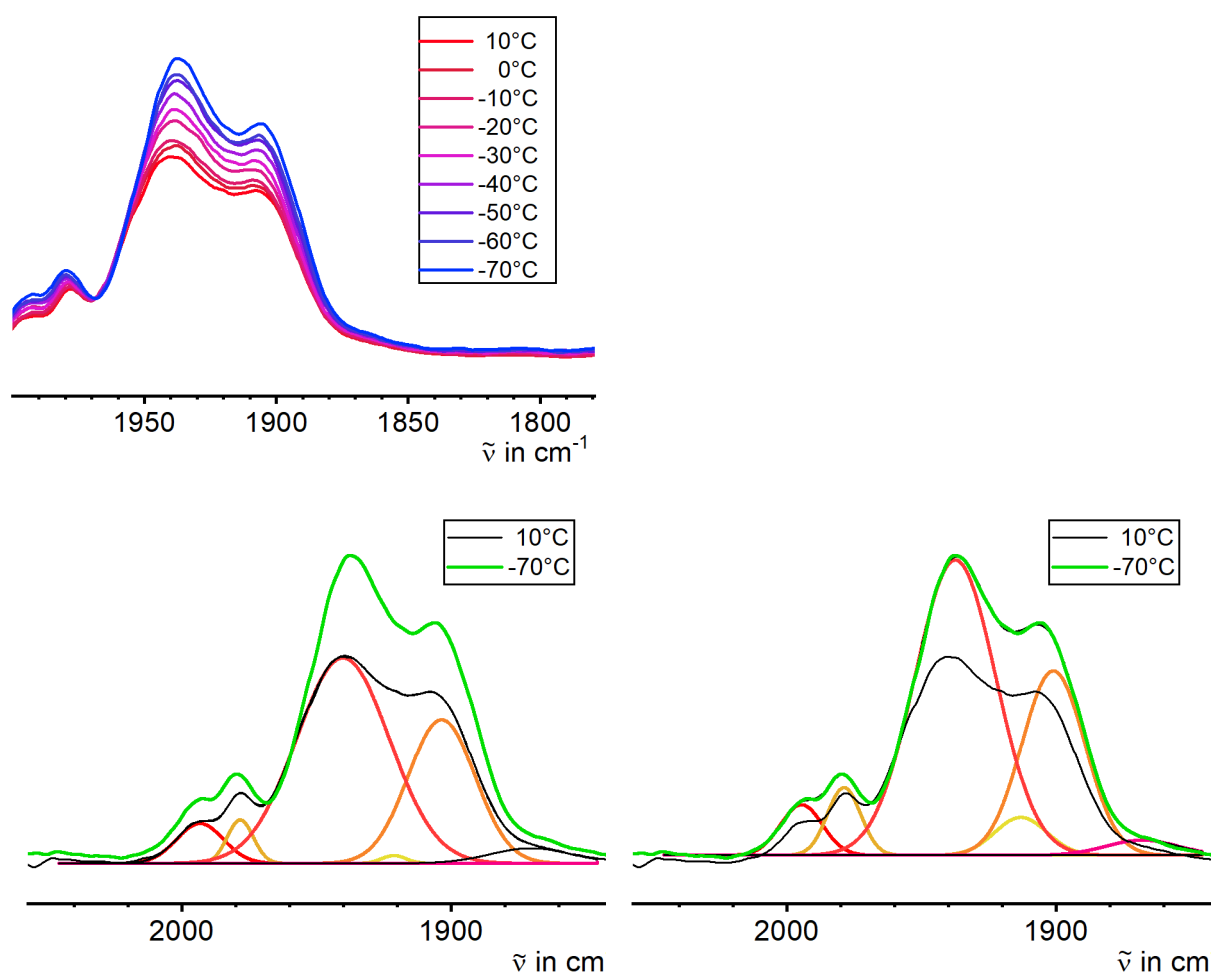

Figure S25.  $T$ -dependent IR spectra of **2-OMe\*\*** in the range of the Ru(CO) stretching vibrations over a temperature range of +10 °C to -70 °C (top). Deconvolution of the spectrum at  $T = 10$  °C (left) and  $T = -70$  °C (right).

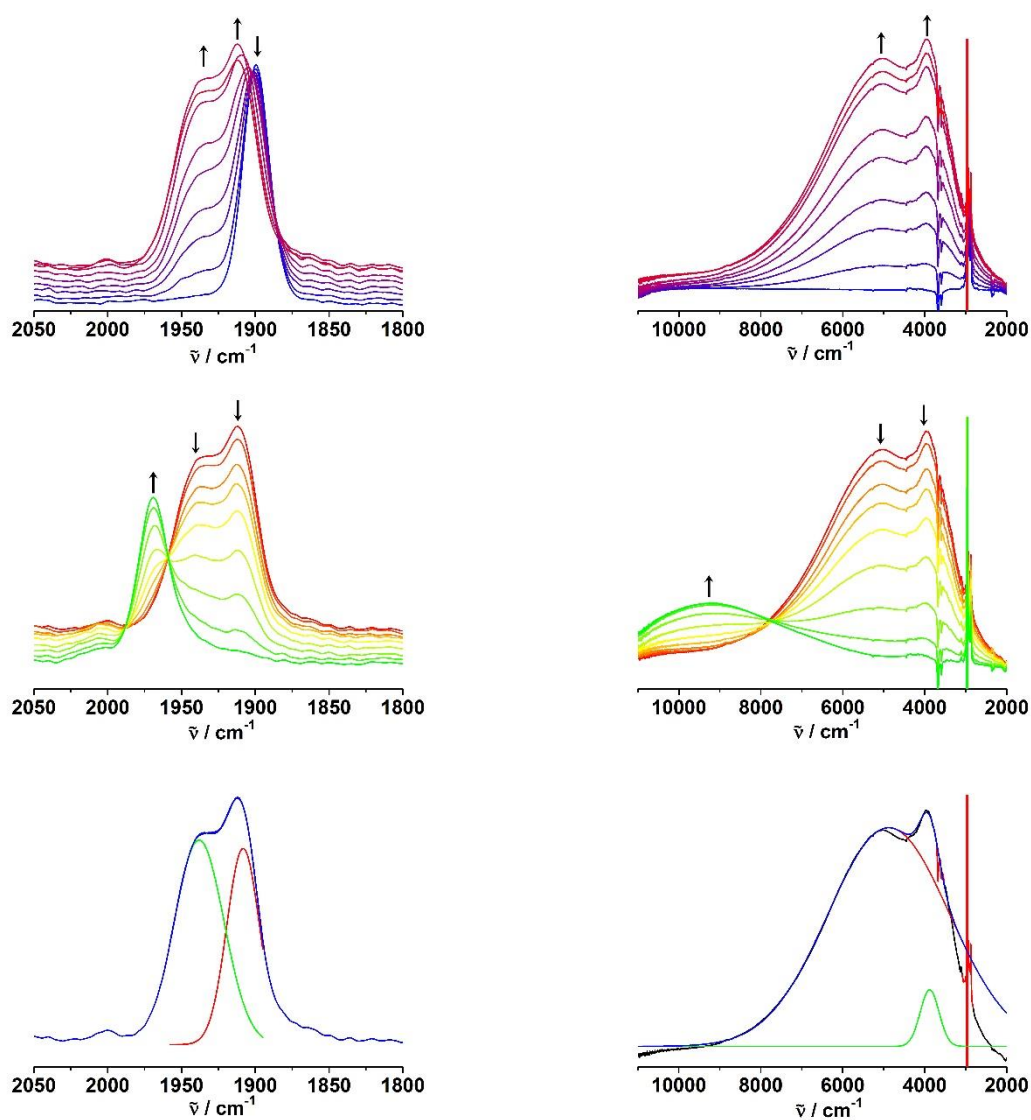

Figure S26. IR and NIR spectroelectrochemistry of **2-H** in 1,2-dichloroethane/ $\text{NBu}_4\text{PF}_6$  (0.1 M) at room temperature and the deconvolution of the two-band pattern in the IR and NIR regions. Top and middle panel: blue = neutral, red = radical cation, green = dication. Bottom: Red and green lines represent the two Gaussians and the blue line their sum; the black line represents the experimental spectrum.

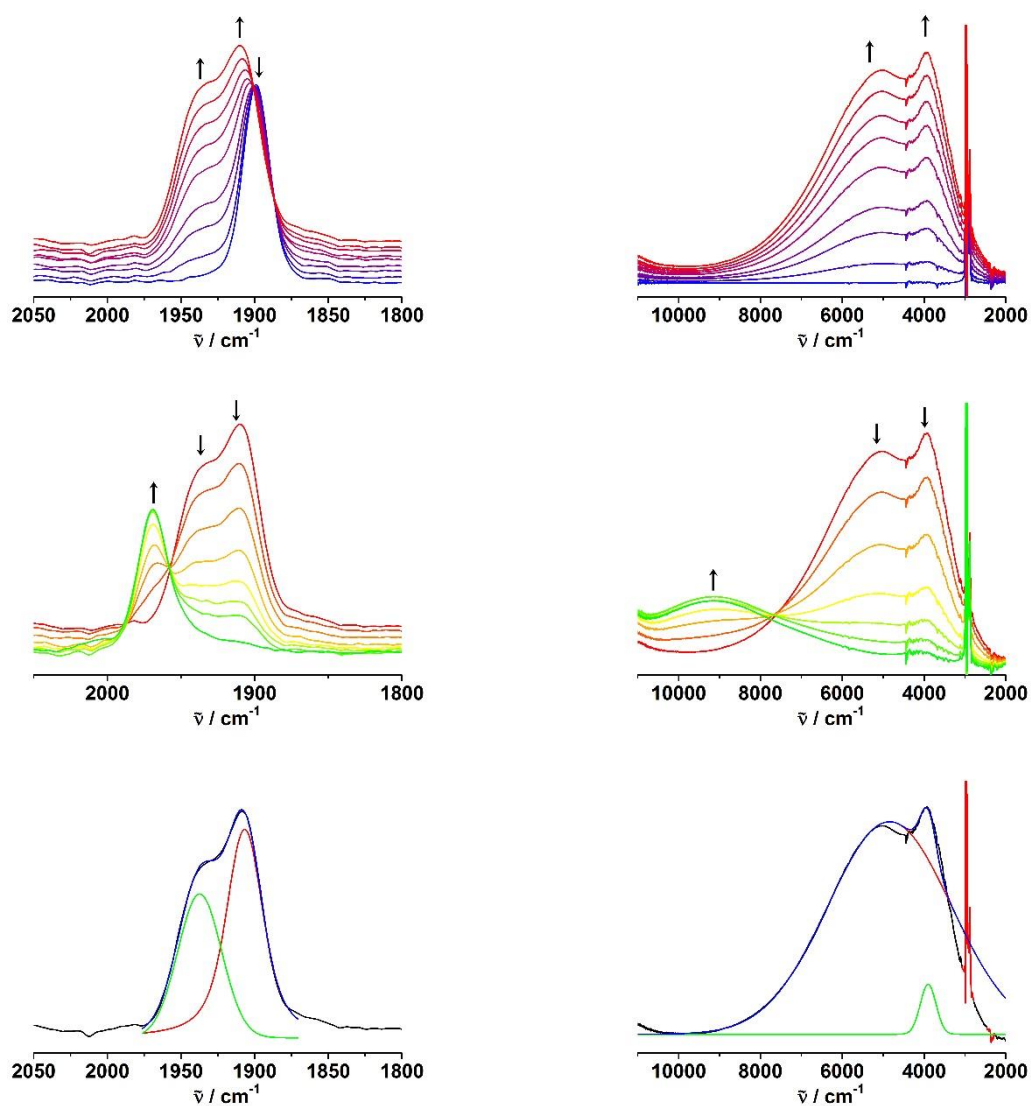

Figure S27. IR and NIR spectroelectrochemistry of **2-D** in 1,2-dichloroethane/ $\text{NBu}_4\text{PF}_6$  (0.1 M) at room temperature and the deconvolution of the two-band pattern in the IR and NIR region. Top and middle panel: blue = neutral, red = radical cation, green = dication. Bottom: Red and green lines represent the two Gaussians and the blue line their sum; the black line represents the experimental spectrum.



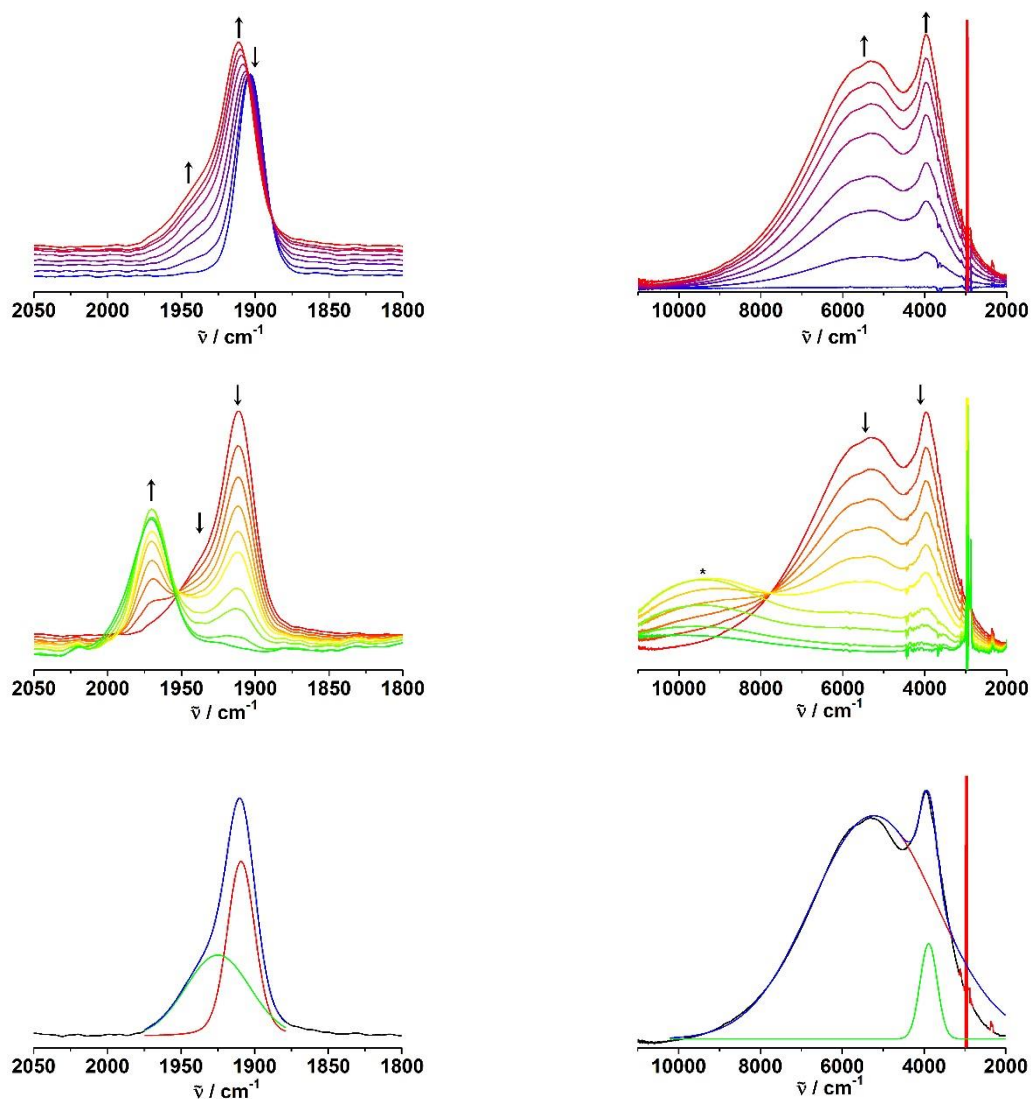

Figure S28. IR and NIR spectroelectrochemistry of **2-CF<sub>3</sub>** in 1,2-dichloroethane/NBu<sub>4</sub>PF<sub>6</sub> (0.1 M) at room temperature and the deconvolution of the two-band pattern in the IR and NIR region. Top and middle panel: blue = neutral, red = radical cation, green = dication. Bottom: Red and green lines represent the two Gaussians and the blue line their sum; the black line represents the experimental spectrum.

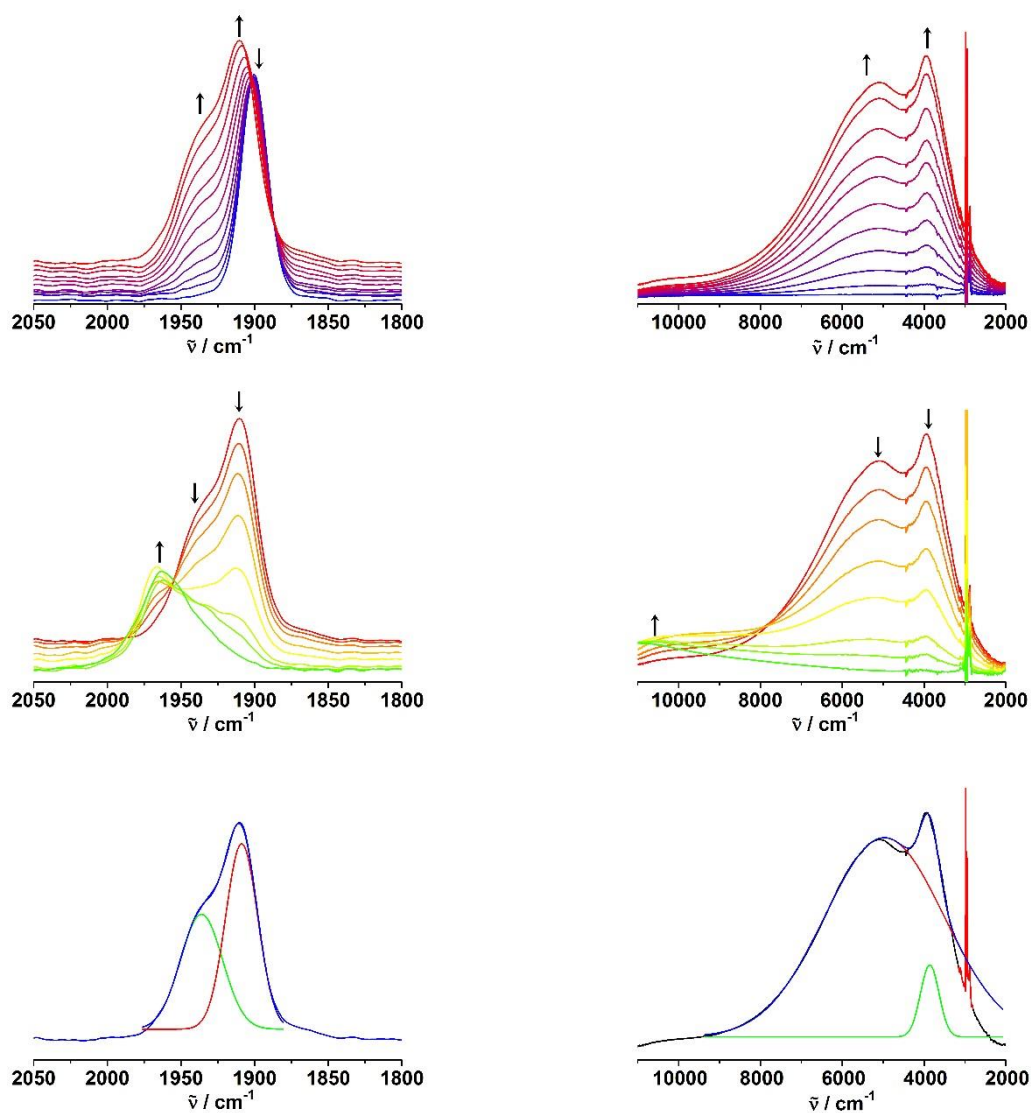

Figure S29. IR and NIR spectroelectrochemistry of **2-F** in 1,2-dichloroethane/NBu<sub>4</sub>PF<sub>6</sub> (0.1 M) at room temperature and the deconvolution of the two-band pattern in the IR and NIR region. Top and middle panel: blue = neutral, red = radical cation, green = dication. Bottom: Red and green lines represent the two Gaussians and the blue line their sum; the black line represents the experimental spectrum.

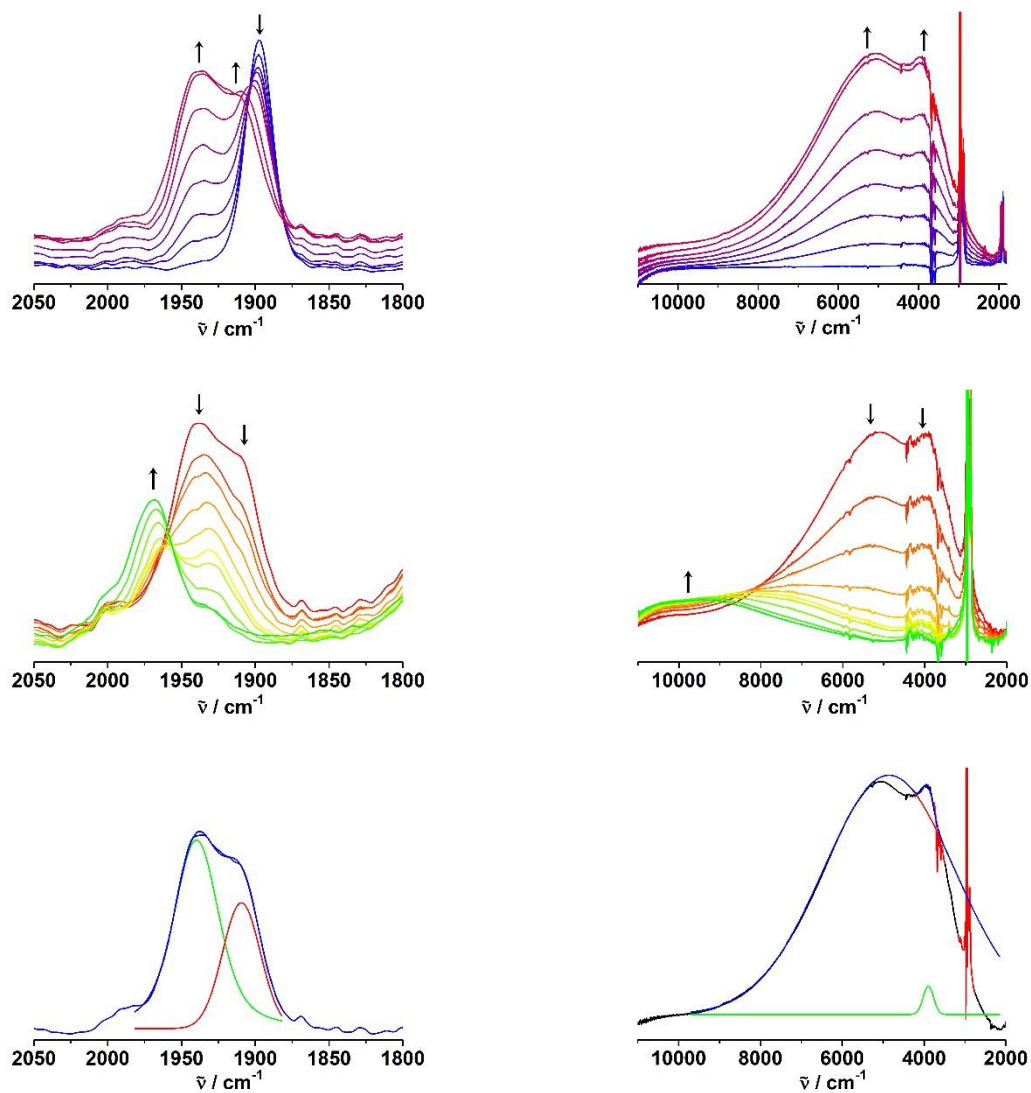

Figure S30. IR and NIR spectroelectrochemistry of **2-OMe** in 1,2-dichloroethane/ $\text{NBu}_4\text{PF}_6$  (0.1 M) at room temperature and the deconvolution of the two-band pattern in the IR and NIR region. Top and middle panel: blue = neutral, red = radical cation, green = dication. Bottom: Red and green lines represent the two Gaussians and the blue line their sum; the black line represents the experimental spectrum.

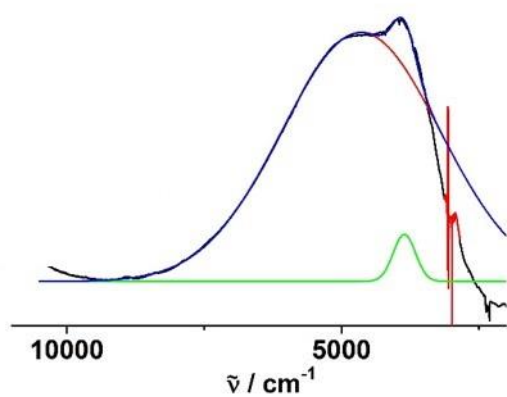

Figure S31. NIR spectrum of the  $[B\{C_6H_3(CF_3)_{2-3,5}\}]^-$  salt of cation **2-OMe**<sup>+</sup> in dichloromethane.

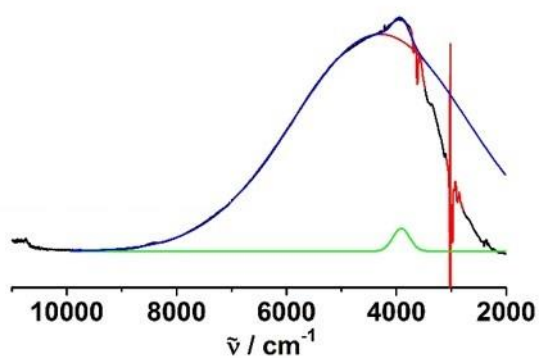

Figure S32. NIR spectrum of the  $[B\{C_6H_3(CF_3)_{2-3,5}\}]^-$  salt of cation **2-OMe**<sup>+</sup> in chloroform with deconvolution.

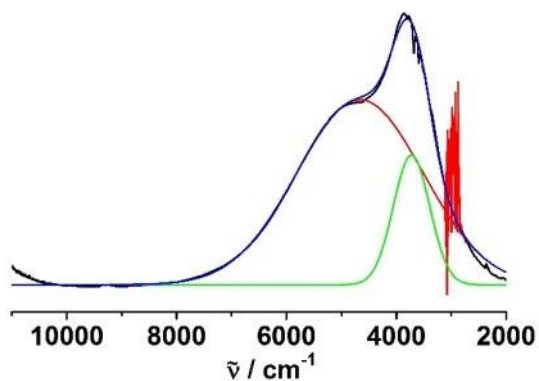

Figure S33. NIR spectrum of the  $[B\{C_6H_3(CF_3)_{2-3,5}\}]^-$  salt of cation **2-OMe**<sup>+</sup> in toluene with deconvolution.

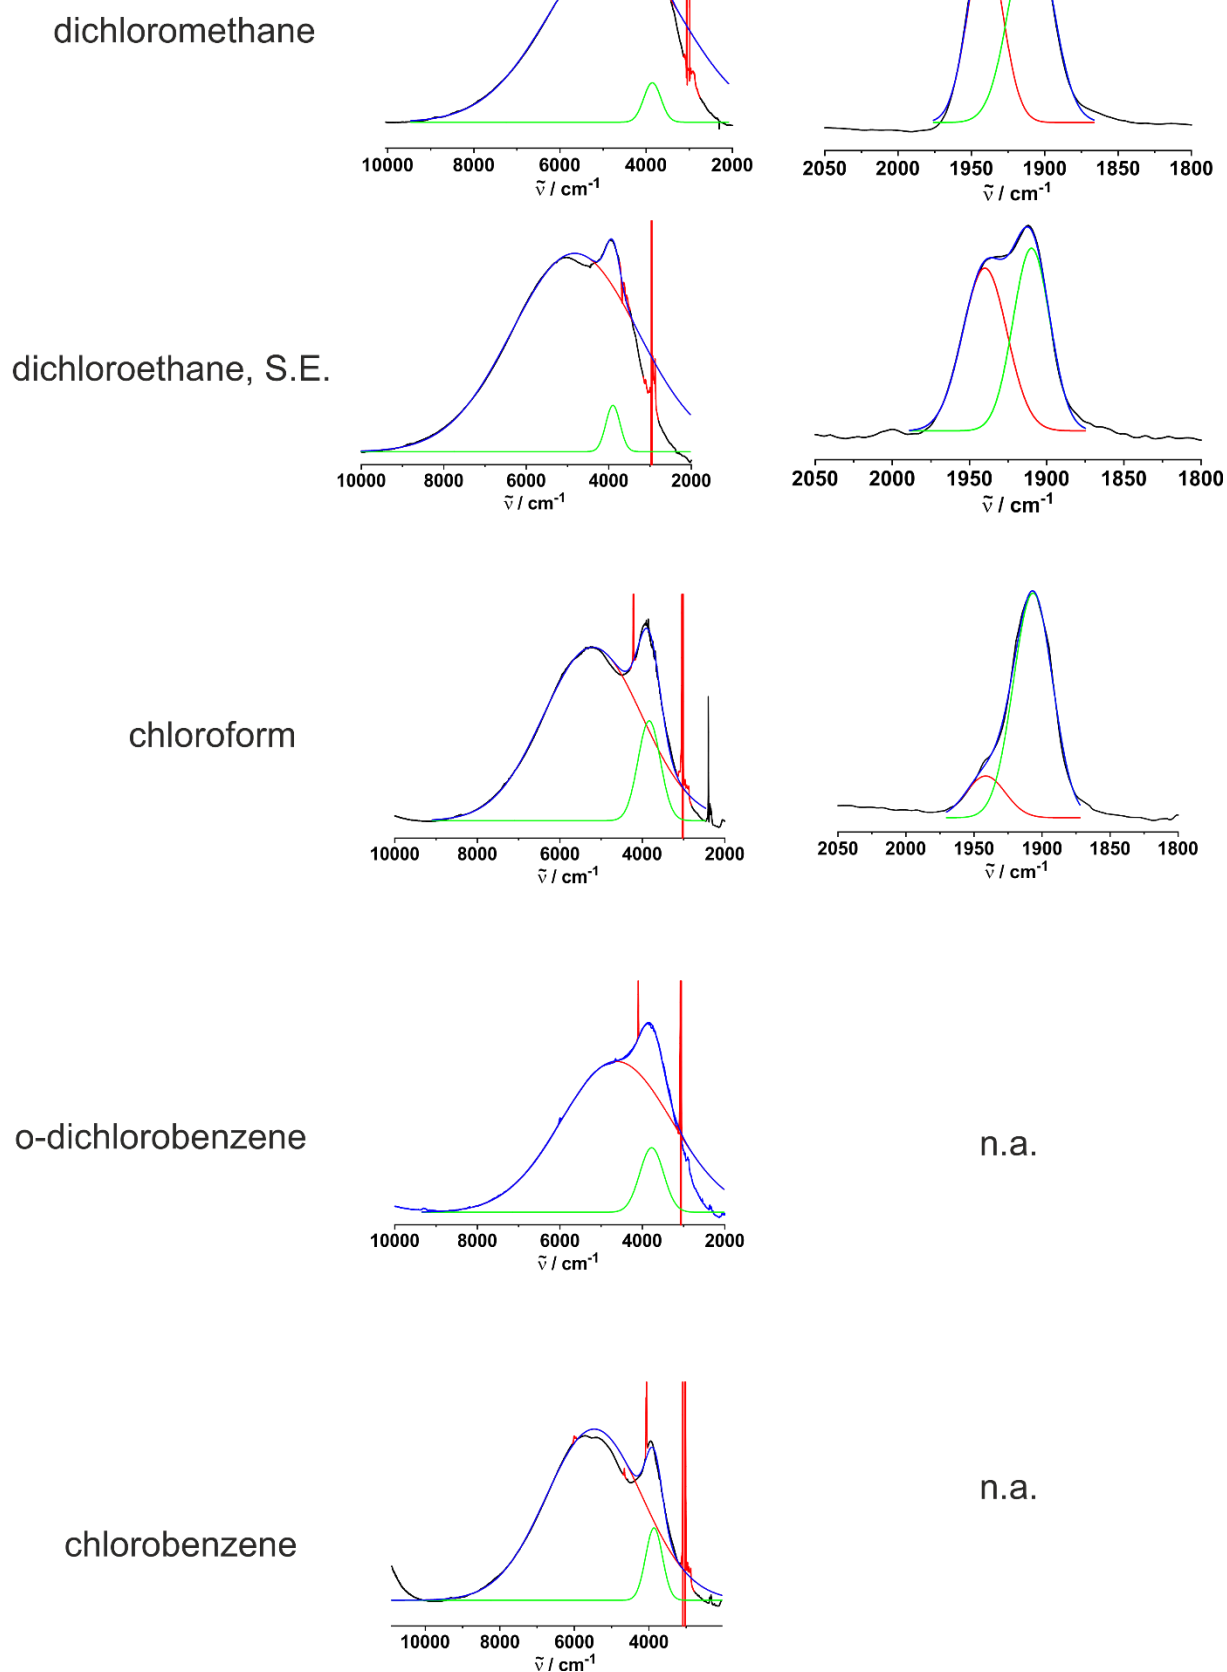

Figure S34. Study of the solvatochromism of **2-H<sup>+</sup>**. NIR and IR spectra in the region of the CO-stretching vibrations with deconvolutions.

Table S2. Data from deconvolution of the NIR spectrum of the PF<sub>6</sub><sup>-</sup> salt of **2-OMe**<sup>+</sup> in different solvents

| Solvent               | FWHM high energy | FWHM low energy | dielectric constant |
|-----------------------|------------------|-----------------|---------------------|
| chloroform            | 2809             | 638             | 4.81                |
| chlorobenzene         | 3033             | 531             | 5.62                |
| dichloromethane       | 3567             | 469             | 8.93                |
| o-dichlorobenzene     | 3164             | 678             | 9.93                |
| dichloroethane, S.El. | 3601             | 405             | 10.36               |

Table S3. Data from deconvolution of the NIR spectrum of the [B{C<sub>6</sub>H<sub>3</sub>(CF<sub>3</sub>)<sub>2-3,5</sub>}]<sup>-</sup> salt of **2-OMe**<sup>+</sup> in different solvents (FWHM = full-width at half-height)

| Solvent                      | FWHM high energy | FWHM low energy | dielectric constant |
|------------------------------|------------------|-----------------|---------------------|
| toluene                      | 2703             | 781             | 2.38                |
| OE <sub>t</sub> <sub>2</sub> | 3168             | 590             | 4.33                |
| chloroform                   | 3717             | 363             | 4.81                |
| chlorobenzene                | 3353             | 606             | 5.62                |
| dichloromethane              | 3383             | 477             | 8.93                |
| o-dichlorobenzene            | 3456             | 543             | 9.93                |

Table S4. *r<sub>CO</sub>* and NIR solvatochromism of **2-H**<sup>+</sup> (*r<sub>CO</sub>* = ratio of the peak area of the CO band at the higher energy to the total CO band intensities as defined by eq. 1.)

| solvent              | <i>r<sub>CO</sub></i> | Energy of the NIR bands [cm <sup>-1</sup> ] |
|----------------------|-----------------------|---------------------------------------------|
| dichloromethane      | 0.40                  | 4738+3857                                   |
| chloroform           | 0.16                  | 5205+3835                                   |
| dichloroethane, S.E. | 0.52                  | 4823+3899                                   |
| chlorobenzene        | n.a.                  | 5467+3861                                   |
| o-dichlorobenzene    | n.a.                  | 4629+3774                                   |

## UV/Vis/NIR spectroelectrochemistry

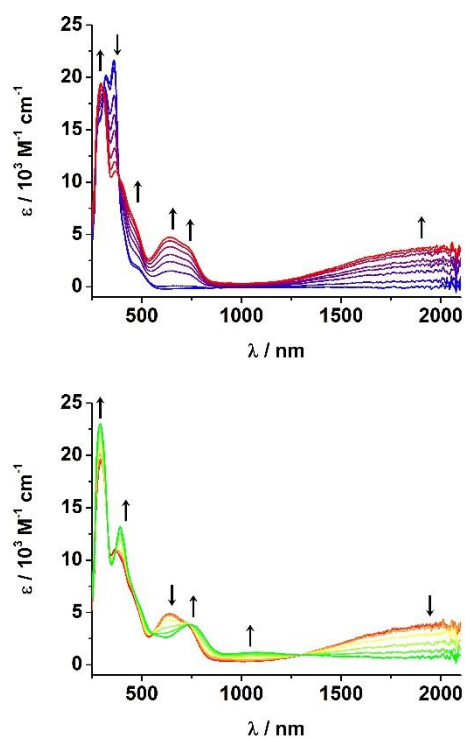

Figure S35. UV/vis/NIR spectroelectrochemistry of complex **2-H** in 1,2-dichloroethane/ $\text{NBu}_4\text{PF}_6$  (0.1 M) at room temperature (blue line = neutral complex, red line = radical cation, green line = dication).

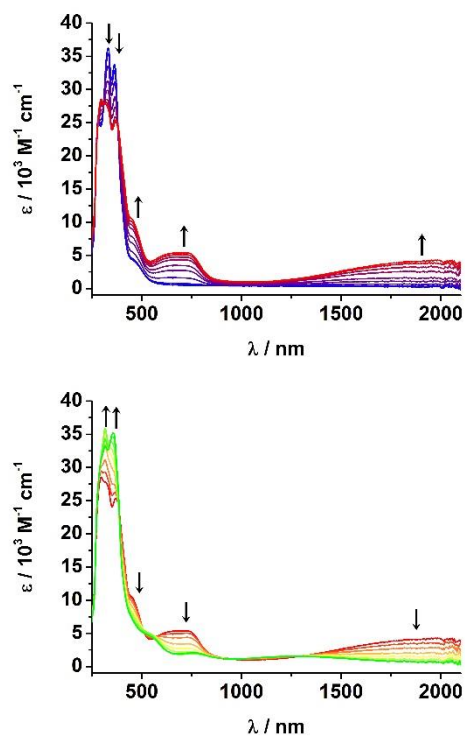

Figure S36. UV/vis/NIR spectroelectrochemistry of complex **2-OMe** in 1,2-dichloroethane/  
NBu<sub>4</sub>PF<sub>6</sub> (0.1 M) at room temperature (blue line = neutral complex, red line = radical cation,  
green line = dication).

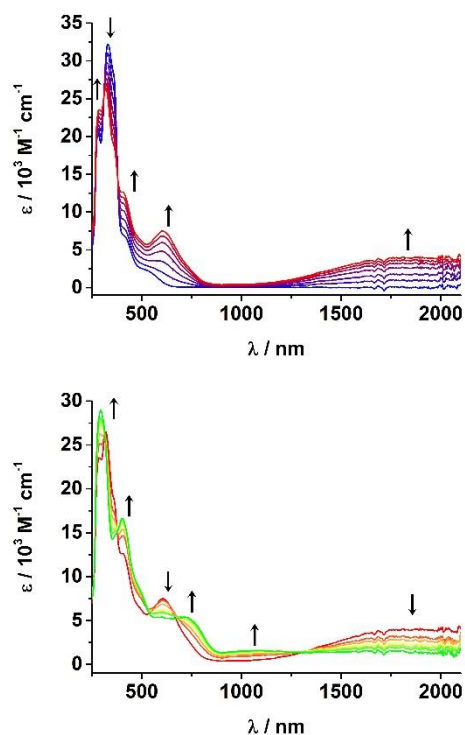

Figure S37. UV/vis/NIR spectroelectrochemistry of complex **2-CF<sub>3</sub>** in 1,2-dichloroethane/  
NBu<sub>4</sub>PF<sub>6</sub> (0.1 M) at room temperature (blue line = neutral complex, red line = radical cation,  
green line = dication).



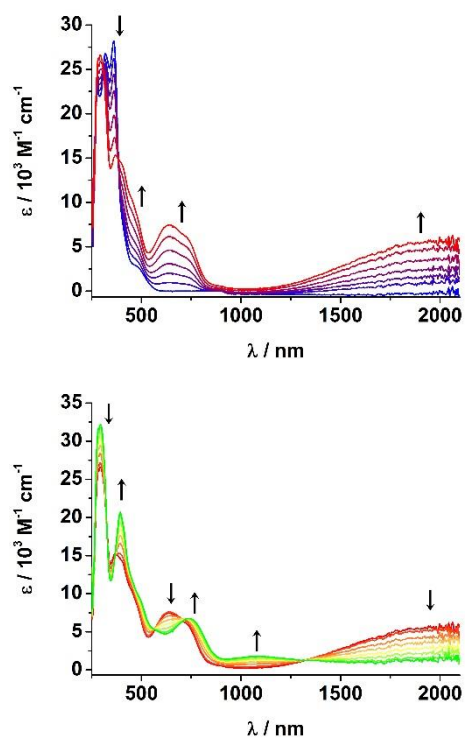

Figure S38. UV/vis/NIR spectroelectrochemistry of complex **2-D** in 1,2-dichloroethane/  
NBu<sub>4</sub>PF<sub>6</sub> (0.1 M) at room temperature (blue line = neutral complex, red line = radical cation,  
green line = dication).

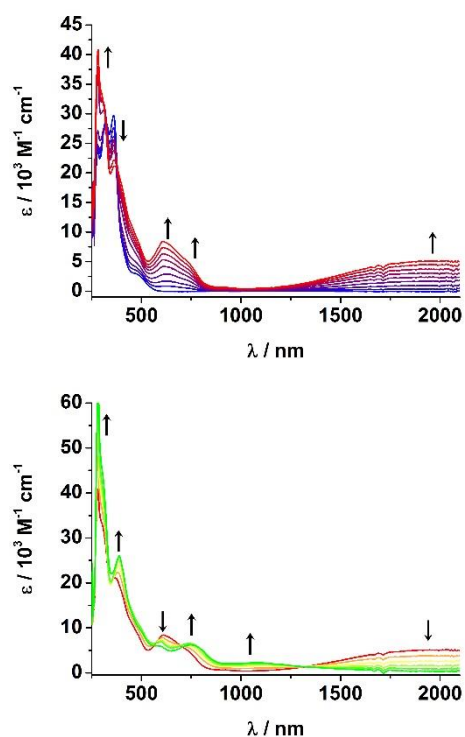

Figure S39. UV/vis/NIR spectroelectrochemistry of complex **2-F** in 1,2-dichloroethane/  
NBu<sub>4</sub>PF<sub>6</sub> (0.1 M) at room temperature (blue line = neutral complex, red line = radical cation,  
green line = dication).

## EPR spectra

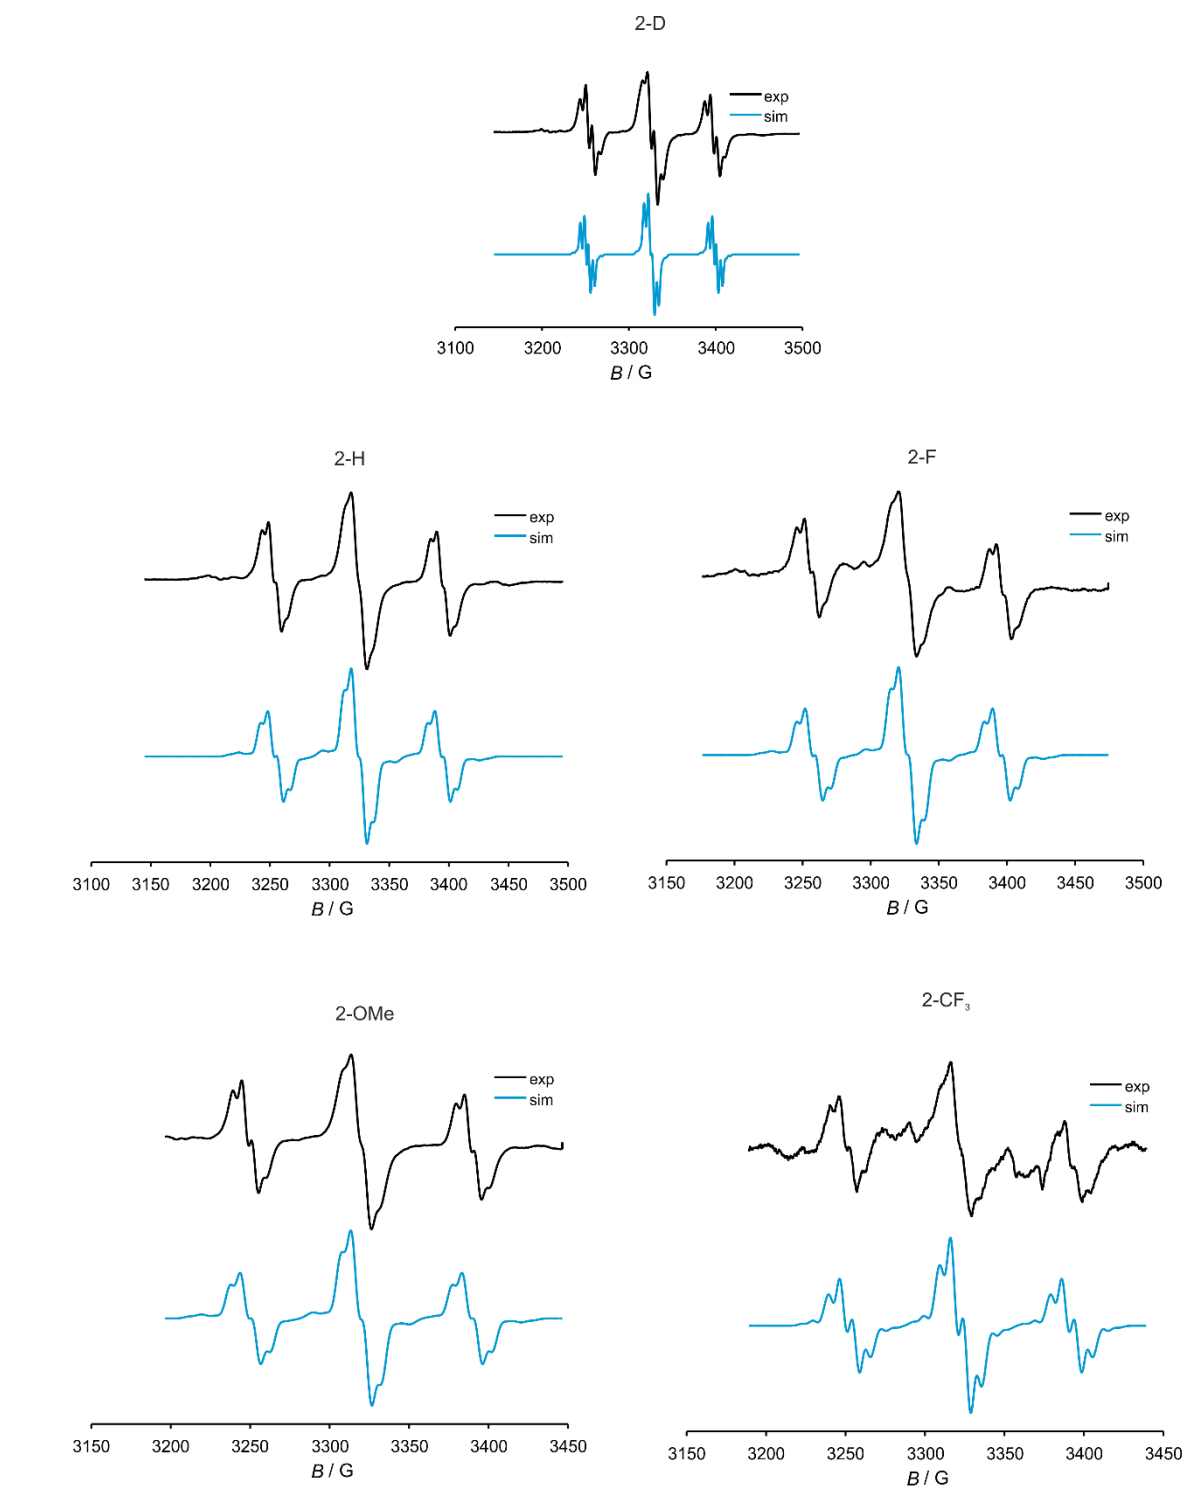

Figure S40. EPR spectra of the radical cations of the complexes at room temperature (black lines) and simulated spectra (blue lines).

## Mössbauer spectra

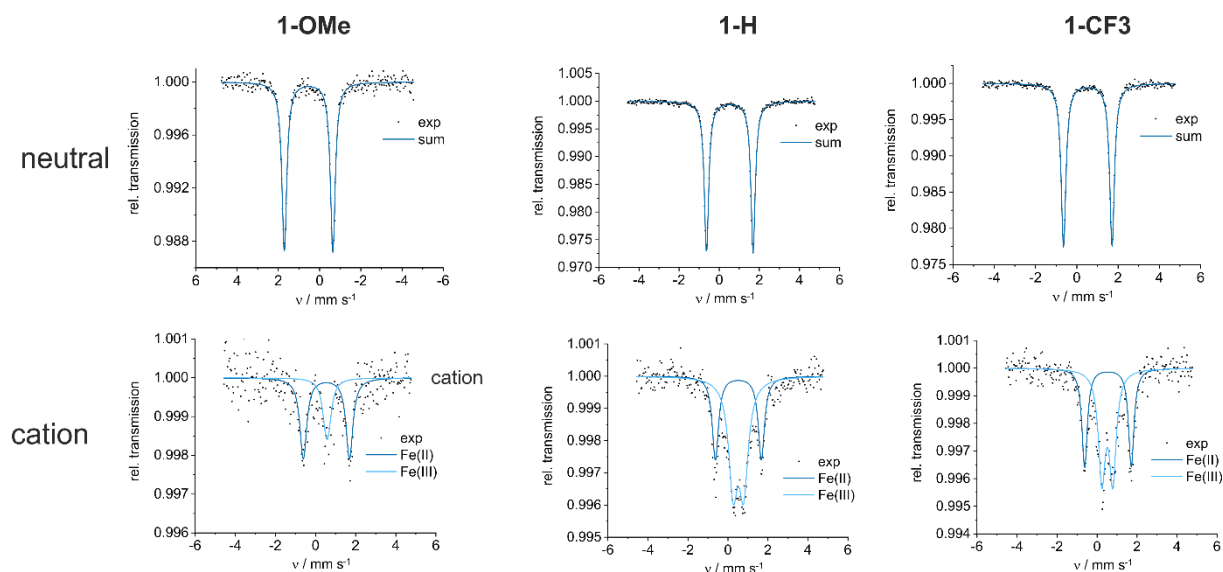

Figure S41. Mössbauer spectra of complexes **2-OMe**, **2-H**, and **2-CF<sub>3</sub>** in their neutral (top) and radical cationic forms (bottom) at 80 K, referenced against  $\alpha$ -Fe.

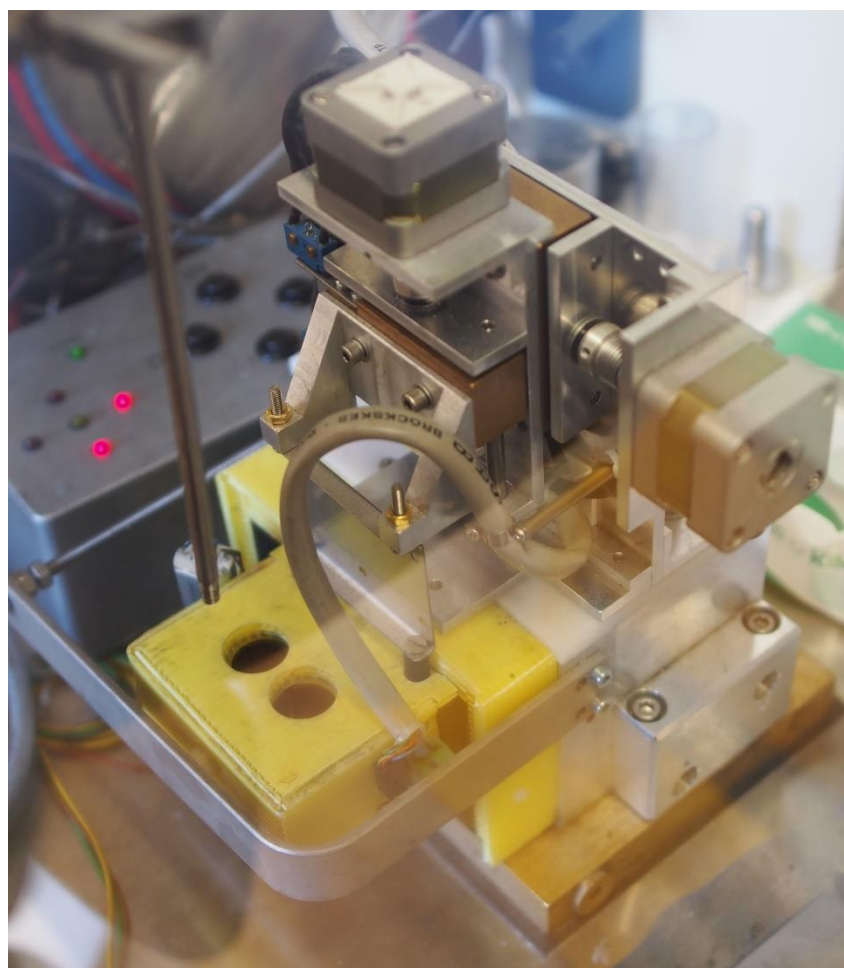

Figure S422. Photography of the setup used for the acquisition of  $T$ -dependent IR spectra.
